# Supplementary material for: Human colorectal cancer-specific CCAT1-L lncRNA regulates long-range chromatin interactions at the MYC locus
Source: PubMed Central journal article supplement — Cell Res. 2014 Mar 25;24(5):513–31. doi: 10.1038/cr.2014.35 (PMC4011346; doi:10.1038/cr.2014.35), 2014-03-25
Supplement: cr201435x1.pdf [file cr201435x1.pdf]

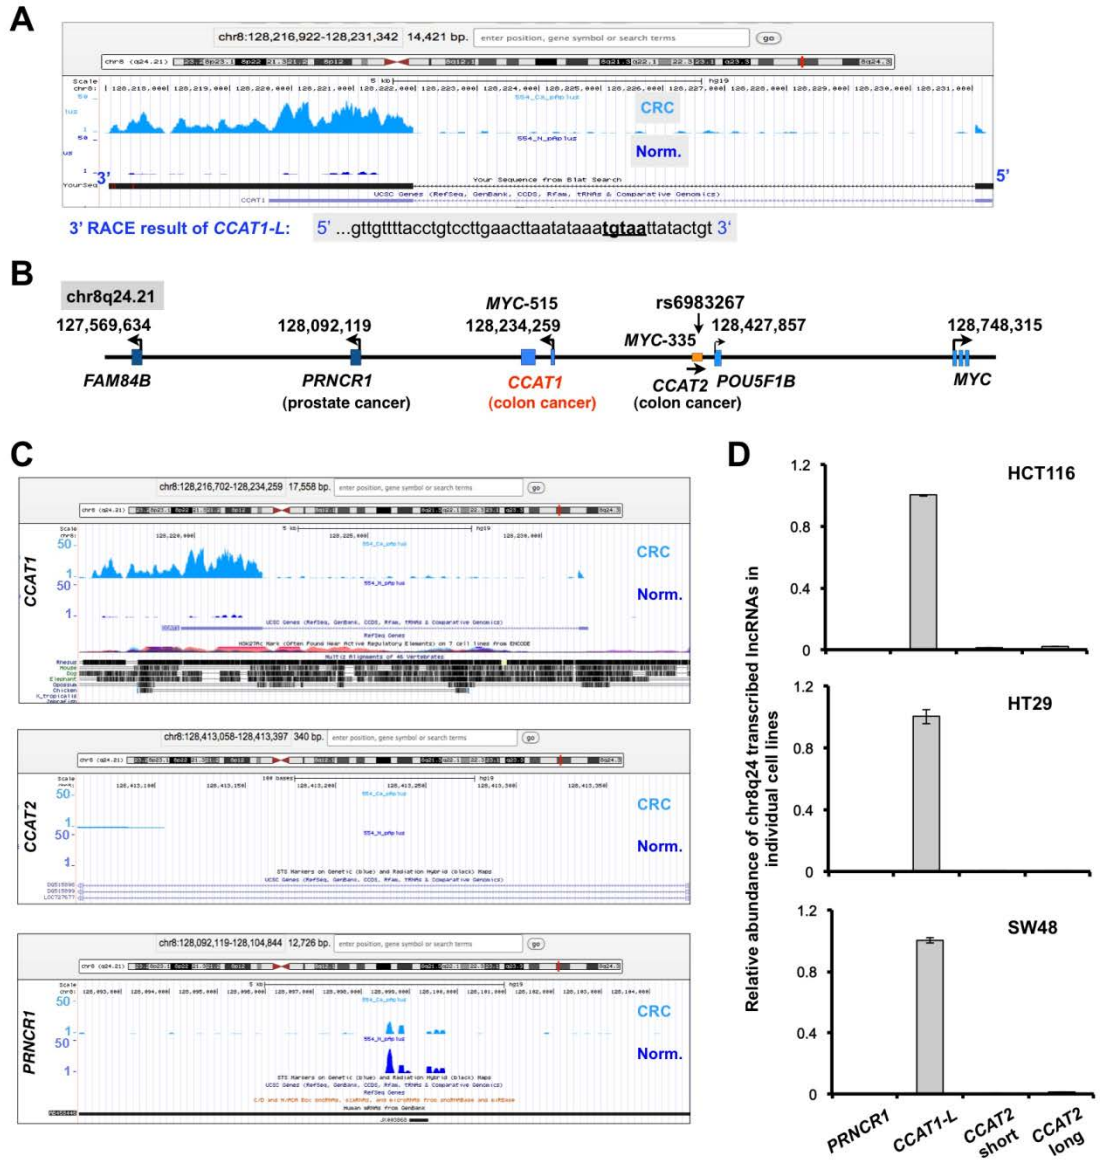

**Supplementary information, Figure S1** Genome organization of 8q24 region lncRNAs (related to Figure 1). (A) 3' RACE result of CCAT1-L. The Sanger sequencing of the 3' end RACE result of CCAT1-L is shown. (B) Genome organization of 8q24 region lncRNAs and their tissue-/tumor-type specific expression patterns are also indicated. (C) CCAT1s are much more abundantly expressed in human CRC patient samples than other 8q24 lncRNAs. Data were retrieved from RNA-sequencing datasets of the paired

CRC/control mucosa samples in this study. (D) CCAT1-L is much more abundantly expressed in examined CRC-derived cell lines than other 8q24 lncRNAs. RT-qPCR detected the abundant expression of CCAT1-L, but not other 8q24 lncRNAs in HCT116, HT29 and SW48 cell lines.
