# Supplementary material for: Human colorectal cancer-specific CCAT1-L lncRNA regulates long-range chromatin interactions at the MYC locus
Source: PubMed Central journal article supplement — Cell Res. 2014 Mar 25;24(5):513–31. doi: 10.1038/cr.2014.35 (PMC4011346; doi:10.1038/cr.2014.35), 2014-03-25
Supplement: cr201435x2.pdf [file cr201435x2.pdf]

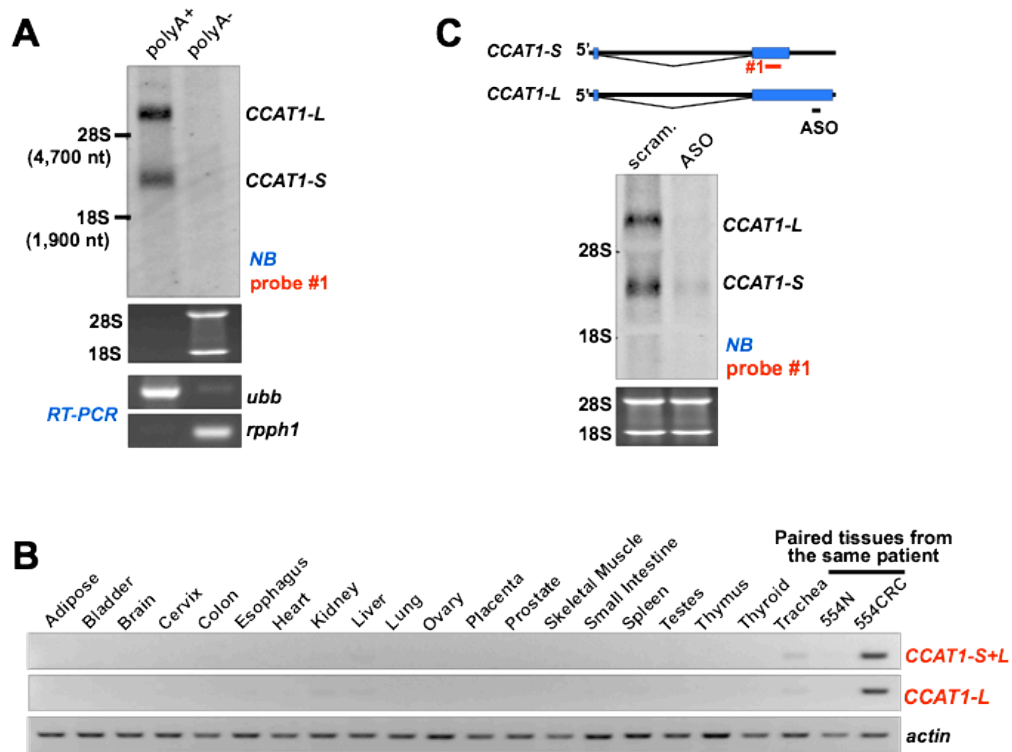

**Supplementary information, Figure S2** Characterization of *CCAT1-L* (related to Figure 1). (A) *CCAT1* RNAs are polyadenylated (poly(A)+). NB validated both *CCAT1* isoforms are enriched in oligo d(T) selection. Middle, 28S and 18S rRNAs were used as markers for non-polyadenylated (poly(A)-) RNAs on native Agarose gel. Bottom, *ubb* and *rpph1* were used as markers for poly(A)+ and poly(A)- RNAs in semi-quantitative RT-PCR. (B) *CCAT1-L* is specifically expressed in human CRC as revealed by semi-quantitative RT-PCR. Primers used were described in Figure 1B. The same amount of cDNA from each sample was used to amplify *actin* mRNA as a loading control. (C) Knockdown of *CCAT1-L* led to the simultaneous disruption of *CCAT1-S*. NB revealed the relative abundance of *CCAT1-L* and

*CCAT1-S* after the treatment of HT29 cells with an ASO (shown in Figure 2A) that targets only *CCAT1-L*. 18S and 18S rRNAs were used as loading controls.
