# Supplementary material for: Human colorectal cancer-specific CCAT1-L lncRNA regulates long-range chromatin interactions at the MYC locus
Source: PubMed Central journal article supplement — Cell Res. 2014 Mar 25;24(5):513–31. doi: 10.1038/cr.2014.35 (PMC4011346; doi:10.1038/cr.2014.35), 2014-03-25
Supplement: cr201435x4.pdf [file cr201435x4.pdf]

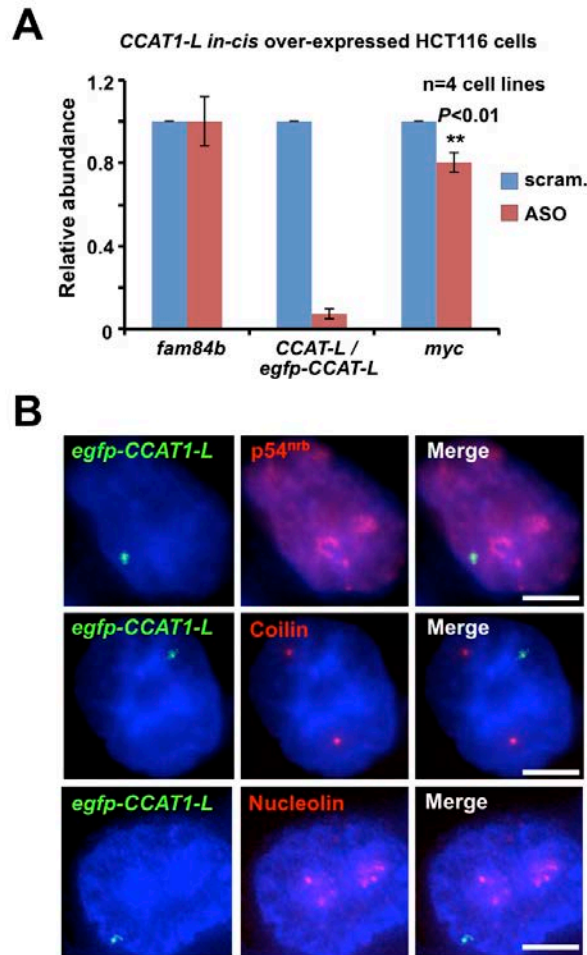

**Supplementary information, Figure S4** Characterization of *CCAT1-L in-cis* over-expression cell lines and the control cell lines (related to Figure 3). (A) Depletion of *CCAT1-L* by ASO in *egfp-CCAT1-L in-cis* over-expression HCT116 cells also led to modestly reduced expression of *MYC*. The same ASO and the same set of primers that recognize both *CCAT-L* and *egfp-CCAT1-L* were used as described in Figure 2B. The relative expression of *CCAT1-L*, *MYC*, and *FAM84B* were examined 36 hours after the ASO treatment. Bar plots represent the relative expression of genes (normalized to *actin*). Error bars represent  $\pm$  SD from 4 independent *CCAT1-L in-cis* over-expressed cell lines. \*\* $P < 0.01$ , one-tail t tests in the pairwise comparison are indicated. (B) The *in-cis* over-expressed

*egfp-CCAT1-L* does not colocalize with marker proteins for several known nuclear bodies. Co-staining of *egfp-CCAT1-L* (green) and marker proteins for paraspeckles (p54<sup>nrb</sup>, red), Cajal Bodies (Coilin, red) and Nucleoli (Nucleolin, red), respectively. Representative images are shown.
