# Supplementary material for: Human colorectal cancer-specific CCAT1-L lncRNA regulates long-range chromatin interactions at the MYC locus
Source: PubMed Central journal article supplement — Cell Res. 2014 Mar 25;24(5):513–31. doi: 10.1038/cr.2014.35 (PMC4011346; doi:10.1038/cr.2014.35), 2014-03-25
Supplement: cr201435x5.pdf [file cr201435x5.pdf]

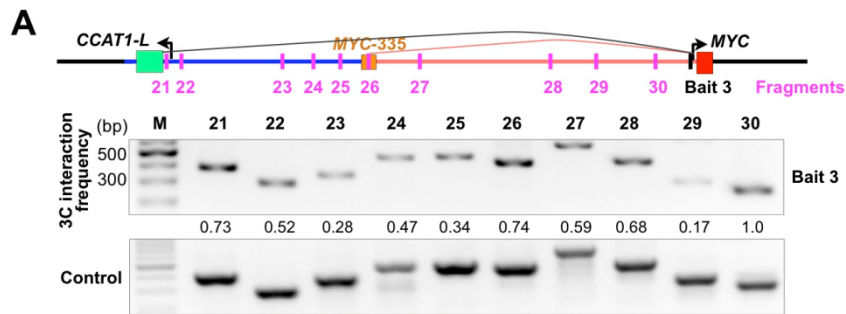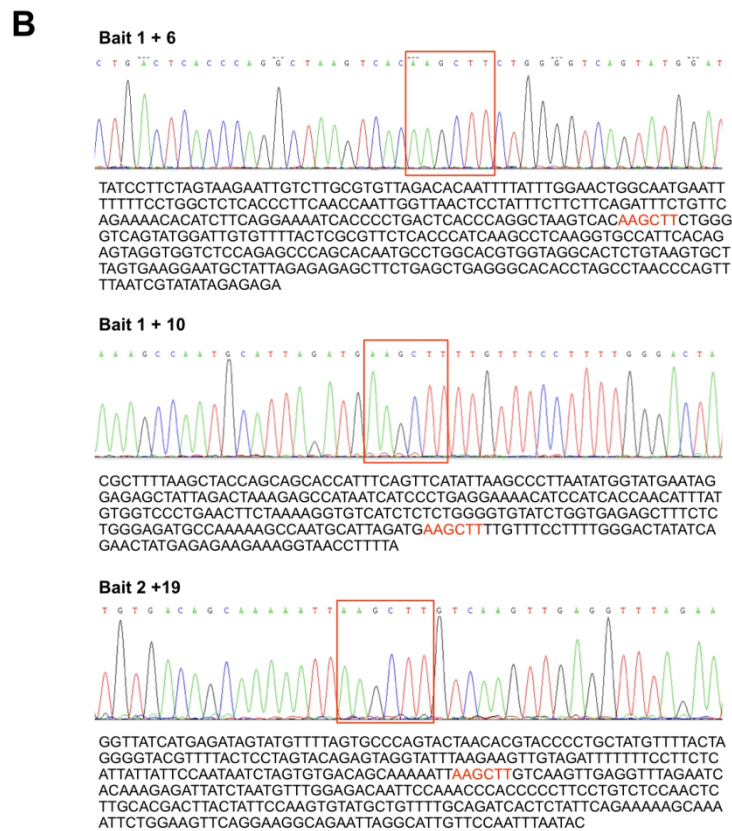

**Supplementary information, Figure S5** Characterization of the long-range chromatin interaction the *MYC* promoter and its upstream regulatory elements (related to Figures 4 and 5). (A) Multiple chromatin loops in the upstream region of *MYC* in HT29 cells. Physical map of the region spanning a 550 kb distance with *CCAT1* (*MYC*-515) at one end and *MYC* at the other, interrogated by 3C. Top, the position of the constant fragment containing *MYC* promoter is marked by a

black bar (bait 3); positions of Hind III restriction target fragments are marked by pink bars. Bottom, 3C interaction frequencies of the constant fragment with each other fragment. The results revealed that the increased interaction between *MYC-335* and the *MYC* promoter and between *MYC-335* and *MYC-515*. The relative abundance of each 3C PCR product was determined using ImageJ, normalized by each corresponding input signal and the bait PCR product (set as 1.0), and labeled underneath.(B) Examples of Sanger sequencing of the 3C PCR products from the examined long-range chromatin interaction regions. Hind III restriction sites are marked with red rectangle lines, nucleotides in the upstream of the Hind III restriction site are from one chromatin region (for example, *MYC-335*, bait1) and nucleotides in the downstream of the Hind III restriction site are from another chromatin region in distance (for example, the *MYC* promoter, #6). The majority of the 3C products were verified in this way to make sure the accuracy of the PCR products.
