# Supplementary material for: Human colorectal cancer-specific CCAT1-L lncRNA regulates long-range chromatin interactions at the MYC locus
Source: PubMed Central journal article supplement — Cell Res. 2014 Mar 25;24(5):513–31. doi: 10.1038/cr.2014.35 (PMC4011346; doi:10.1038/cr.2014.35), 2014-03-25
Supplement: cr201435x6.pdf [file cr201435x6.pdf]

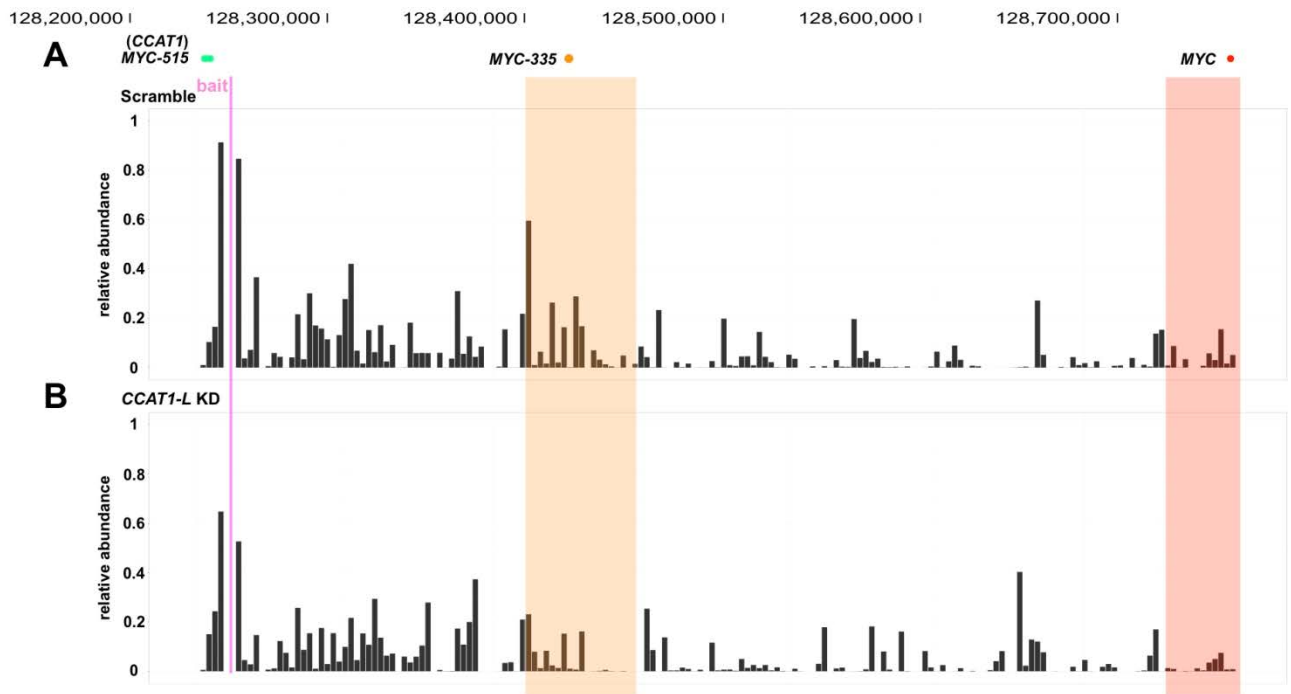

**Supplementary information, Figure S6** *CCAT1-L* regulates the long-range genomic interactions within the *MYC-CCAT1* locus (related to Figures 4-5). (A) 3C-Seq analysis of the *CCAT1-L*-associated chromatin region *in vivo* in HT29 cells treated with scramble ASO. Signals are presented as reads per millions per Hind III restriction fragment after normalized with the total reads and the highest frequency signal nearby the bait primer (vertical axis). The pink bar represents the viewpoint (bait fragment); the *MYC-335* region is marked with yellow shadow, and the *MYC* promoter region is marked with red shadow. (B) 3C-Seq analysis of the *CCAT1-L*-associated chromatin region *in vivo* in HT29 cells after the depletion of *CCAT1-L* by ASO (Bottom). See (A) for details. Note that the locus-wide crosslinking frequencies between *CCAT1-L* and *MYC-335*, and between *CCAT1-L* and the *MYC* promoter are reduced.
