# Supplementary material for: Human colorectal cancer-specific CCAT1-L lncRNA regulates long-range chromatin interactions at the MYC locus
Source: PubMed Central journal article supplement — Cell Res. 2014 Mar 25;24(5):513–31. doi: 10.1038/cr.2014.35 (PMC4011346; doi:10.1038/cr.2014.35), 2014-03-25
Supplement: cr201435x7.pdf [file cr201435x7.pdf]

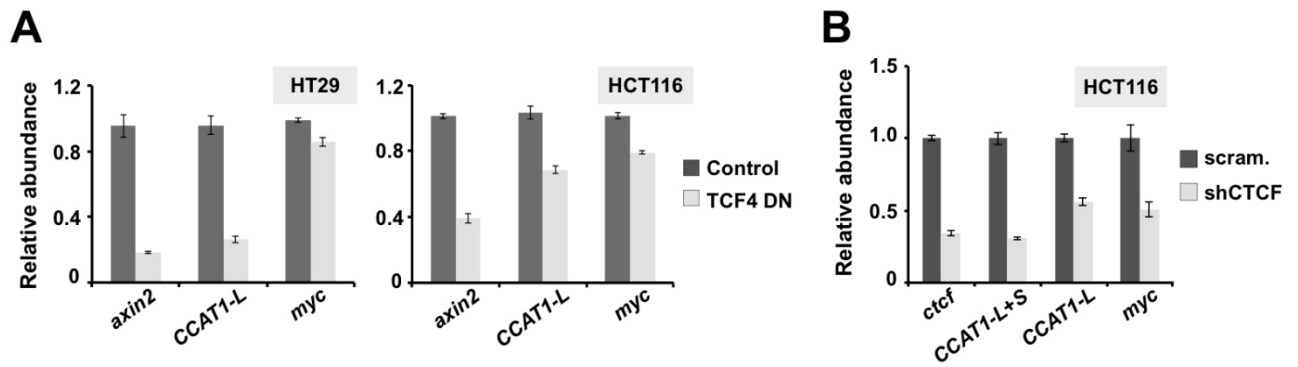

**Supplementary information, Figure S7** TCF4 and CTCF regulates *MYC*

transcription in CRC-derived cell lines (related to Figure 6). (A) TCF4 is required for *MYC* and *CCAT1-L* expression in HT29 (top) and HCT116 cells (bottom).

Over-expression of a dominant-negative (DN) TCF4 expression plasmid resulted in the down-regulation of the known TCF4 target *axin2*, as well as *CCAT1-L* and *myc*. Note that the expression of *CCAT1-L* is more sensitive to TCF4 DN, but *myc* is not.

(B) CTCF is required for *MYC* and *CCAT1-L* expression in HCT116 cells. The relative abundance of *myc* and *CCAT1-L* was analyzed by RT-qPCR.
