# Supplementary material for: Human colorectal cancer-specific CCAT1-L lncRNA regulates long-range chromatin interactions at the MYC locus
Source: PubMed Central journal article supplement — Cell Res. 2014 Mar 25;24(5):513–31. doi: 10.1038/cr.2014.35 (PMC4011346; doi:10.1038/cr.2014.35), 2014-03-25
Supplement: cr201435x8.pdf [file cr201435x8.pdf]

Table S1

**Supplementary information, Table S1** List of genes with altered expression pattern in tumor samples (related to Figure 1). Criteria for inclusion in this list are A) fold change of the control mucosa sample must be  $\geq 5$  or  $\leq 0.2$ ; and B) the P-value of fold change must be  $\leq 0.05$ . Genes are sorted by their fold changes and Wald scores (Wald

|          |            |        |    |        |        |        |   |
|----------|------------|--------|----|--------|--------|--------|---|
| CST1     | chr20:23 - | 3385   | 3  | 156.21 | 0.0524 | 72.901 | 0 |
| DPEP1    | chr16:89 + | 25124  | 13 | 89.057 | 0.3553 | 85.407 | 0 |
| CA9      | chr9:356 + | 7240   | 11 | 88.323 | 0.8421 | 77.349 | 0 |
| ETV4     | chr17:41 - | 18590  | 18 | 54.953 | 0.5674 | 82.168 | 0 |
| CLDN1    | chr3:190 - | 16746  | 4  | 37.495 | 0.2826 | 75.33  | 0 |
| SULT1C4  | chr2:108 + | 9850   | 7  | 46.828 | 0.8161 | 57.613 | 0 |
| REG1A    | chr2:793 + | 2962   | 9  | 21.99  | 0      | 34.528 | 0 |
| COMP     | chr19:18 - | 8532   | 22 | 23.102 | 0.1526 | 52.431 | 0 |
| NKD1     | chr16:50 + | 92531  | 10 | 56.157 | 1.7604 | 141.52 | 0 |
| CEACAM6  | chr19:42 + | 16716  | 6  | 460.48 | 26.875 | 214.01 | 0 |
| GPT2     | chr16:46 + | 46894  | 15 | 62.382 | 2.9415 | 107.76 | 0 |
| MACC1    | chr7:201 - | 82735  | 7  | 28.757 | 0.8596 | 104.02 | 0 |
| HOXB8    | chr17:46 - | 2594   | 2  | 28.917 | 0.9027 | 46.442 | 0 |
| C6orf223 | chr6:439 + | 5358   | 5  | 16.184 | 0.209  | 50.306 | 0 |
| LGR5     | chr12:71 + | 146539 | 23 | 30.068 | 1.5893 | 75.153 | 0 |
| TDGF1    | chr3:466 + | 7908   | 7  | 32.256 | 1.7975 | 51.876 | 0 |
| FZD10    | chr12:13 + | 3282   | 1  | 12.539 | 0.1577 | 42.165 | 0 |
| CALCA    | chr11:14 - | 5618   | 8  | 11.381 | 0.0677 | 32.125 | 0 |
| FOXQ1    | chr6:131 + | 2319   | 1  | 11.228 | 0.1098 | 33.675 | 0 |
| GZMB     | chr14:25 - | 3272   | 6  | 23.097 | 1.1874 | 28.915 | 0 |
| CYP2B6   | chr19:41 + | 27098  | 10 | 16.762 | 0.63   | 45.73  | 0 |
| MMP1     | chr11:10 - | 8326   | 12 | 16.158 | 0.591  | 36.569 | 0 |
| FLJ22184 | chr19:79 - | 5722   | 7  | 12.204 | 0.2304 | 48.344 | 0 |
| NFE2L3   | chr7:261 + | 34910  | 4  | 38.054 | 2.6953 | 71.676 | 0 |
| NEBL     | chr10:21 - | 394214 | 34 | 23.191 | 1.3151 | 96.805 | 0 |
| TESC     | chr12:11 - | 60524  | 9  | 27.085 | 1.7399 | 32.081 | 0 |
| SAA1     | chr11:18 + | 3716   | 6  | 10.636 | 0.2353 | 17.394 | 0 |
| CTHRC1   | chr8:104 + | 11490  | 6  | 17.382 | 0.9896 | 36.146 | 0 |
| PROX1    | chr1:214 + | 53570  | 6  | 15.675 | 0.8313 | 72.422 | 0 |
| MLXIPL   | chr7:730 - | 31347  | 27 | 19.242 | 1.2311 | 55.793 | 0 |
| OR51E1   | chr11:46 + | 11561  | 4  | 10.017 | 0.2373 | 36.062 | 0 |
| TOX3     | chr16:52 - | 109797 | 10 | 56.747 | 5.8202 | 79.686 | 0 |
| TRIB3    | chr20:36 + | 16896  | 6  | 18.016 | 1.3612 | 42.919 | 0 |
| HILPDA   | chr7:128 + | 2589   | 5  | 27.73  | 2.5796 | 36.504 | 0 |
| HV98306  | chr6:437 + | 51     | 1  | 128.57 | 16.162 | 14.21  | 0 |
| SLC6A6   | chr3:144 + | 86782  | 19 | 17.912 | 1.5107 | 68.581 | 0 |
| GRM8     | chr7:126 - | 814496 | 18 | 11.437 | 0.6847 | 45.154 | 0 |
| CCAT1    | chr8:128 - | 14688  | 2  | 7.4567 | 0.1814 | 41.737 | 0 |
| UBD      | chr6:295 - | 4314   | 2  | 14.297 | 1.1664 | 22.33  | 0 |
| ATHL1    | chr11:28 + | 6551   | 21 | 22.735 | 2.3709 | 52.136 | 0 |
| ARL5B    | chr10:18 + | 18628  | 6  | 11.362 | 0.775  | 38.67  | 0 |
| CDCA7    | chr2:174 + | 14158  | 11 | 81.61  | 11.06  | 82.776 | 0 |
| THBS2    | chr6:169 - | 38263  | 23 | 34.711 | 4.2446 | 79.225 | 0 |
| VEGFA    | chr6:437 + | 16278  | 15 | 45.841 | 5.8812 | 78.994 | 0 |
| HOXB9    | chr17:46 - | 5317   | 2  | 102.14 | 14.305 | 90.137 | 0 |
| SOX4     | chr6:215 + | 4878   | 1  | 68.782 | 9.4806 | 99.769 | 0 |
| PCSK1    | chr5:957 - | 42946  | 16 | 12.719 | 1.0673 | 48.6   | 0 |
| AZGP1    | chr7:995 - | 9386   | 4  | 40.738 | 5.4254 | 39.38  | 0 |

Table S1

|          |            |        |    |        |        |         |   |
|----------|------------|--------|----|--------|--------|---------|---|
| ABCB1    | chr7:871 - | 209461 | 31 | 18.894 | 2.1267 | 53.455  | 0 |
| BC03795  | chr15:38 - | 87271  | 4  | 16.338 | 1.8449 | 35.962  | 0 |
| ECT2     | chr3:172 + | 70790  | 29 | 26.146 | 3.4636 | 61.645  | 0 |
| HSPH1    | chr13:31 - | 25740  | 21 | 52.618 | 7.9166 | 88.563  | 0 |
| SHCBP1   | chr16:46 - | 40844  | 13 | 11.829 | 1.1455 | 35.864  | 0 |
| FGGY     | chr1:597 + | 465778 | 23 | 16.255 | 1.8994 | 45.232  | 0 |
| ORC6     | chr16:46 + | 8749   | 11 | 20.199 | 2.5632 | 47.531  | 0 |
| AK12423  | chr13:11 - | 3598   | 1  | 15.867 | 1.8504 | 42.521  | 0 |
| VPS35    | chr16:46 - | 29556  | 21 | 86.779 | 13.835 | 124.36  | 0 |
| ACE2     | chrX:155 - | 41037  | 20 | 12.158 | 1.2317 | 37.965  | 0 |
| PLCB4    | chr20:90 + | 411762 | 40 | 36.294 | 5.3285 | 78.842  | 0 |
| CARD11   | chr7:294 - | 137800 | 25 | 12.001 | 1.2139 | 41.688  | 0 |
| SPP1     | chr4:888 + | 7762   | 8  | 41.861 | 6.2998 | 46.528  | 0 |
| ALPK3    | chr15:85 + | 56803  | 15 | 13     | 1.3911 | 68.313  | 0 |
| GTF2IRD  | chr7:738 + | 148801 | 32 | 20.347 | 2.6909 | 62.682  | 0 |
| C6orf222 | chr6:362 - | 21128  | 12 | 13.025 | 1.4353 | 39.641  | 0 |
| ANLN     | chr7:364 + | 63969  | 27 | 18.38  | 2.4364 | 51.413  | 0 |
| SKIL     | chr3:170 + | 39165  | 11 | 14.403 | 1.7629 | 57.099  | 0 |
| PUS7     | chr7:105 - | 65726  | 21 | 15.204 | 1.9112 | 40.482  | 0 |
| PHLDA1   | chr12:76 - | 6330   | 4  | 18.922 | 2.6059 | 57.618  | 0 |
| NPTX2    | chr7:982 + | 12585  | 5  | 10.822 | 1.1462 | 30.998  | 0 |
| LMO7     | chr13:76 + | 239437 | 39 | 23.712 | 3.5069 | 79.24   | 0 |
| XPO5     | chr6:434 - | 53745  | 32 | 32.219 | 5.0788 | 69.411  | 0 |
| E2F3     | chr6:204 + | 91809  | 9  | 12.646 | 1.5362 | 45.135  | 0 |
| NUP153   | chr6:176 - | 91800  | 23 | 30.437 | 4.8754 | 71.244  | 0 |
| SFRP4    | chr7:379 - | 10991  | 6  | 37.314 | 6.2194 | 54.819  | 0 |
| FGFRL1   | chr4:100 + | 15747  | 10 | 23.712 | 3.6625 | 48.395  | 0 |
| SRPK1    | chr6:358 - | 88147  | 21 | 61.867 | 11.04  | 88.987  | 0 |
| LAMC2    | chr1:183 + | 59089  | 25 | 23.329 | 3.7348 | 64.78   | 0 |
| AK02291  | chr10:18 + | 3520   | 1  | 11.015 | 1.346  | 34.742  | 0 |
| BC00508  | chr1:156 - | 1971   | 1  | 12.455 | 1.6471 | 27.218  | 0 |
| SORBS1   | chr10:97 - | 249642 | 44 | 7.2082 | 40.428 | -108.07 | 0 |
| RRAS     | chr19:50 - | 4849   | 6  | 17.712 | 93.606 | -50.067 | 0 |
| THBS4    | chr5:793 + | 47938  | 22 | 18.767 | 98.945 | -93.1   | 0 |
| RARRES3  | chr11:63 + | 9658   | 4  | 7.8294 | 43.718 | -30.705 | 0 |
| GSN      | chr9:123 + | 131360 | 38 | 37.851 | 196    | -176    | 0 |
| FAXDC2   | chr5:154 - | 32162  | 9  | 3.5584 | 22.194 | -44.684 | 0 |
| CCL15    | chr17:34 - | 4467   | 4  | 4.3096 | 26.052 | -28.816 | 0 |
| FAM162A  | chr3:122 + | 25939  | 6  | 13.646 | 73.702 | -53.631 | 0 |
| SLC25A4  | chr4:186 + | 7122   | 4  | 2.4699 | 16.897 | -48.475 | 0 |
| BLVRB    | chr19:40 - | 18035  | 5  | 12.582 | 69.127 | -40.641 | 0 |
| KLF2     | chr19:16 + | 2689   | 3  | 4.7946 | 28.97  | -37.543 | 0 |
| RGMA     | chr15:93 - | 45808  | 12 | 1.8872 | 14.031 | -45.149 | 0 |
| IFI6     | chr1:279 - | 6153   | 7  | 59.119 | 313.28 | -85.751 | 0 |
| CD79A    | chr19:42 + | 4250   | 6  | 3.0471 | 20.272 | -28.132 | 0 |
| TGFB111  | chr16:31 + | 5806   | 13 | 14.247 | 79.598 | -64.721 | 0 |
| TPM1     | chr15:63 + | 29276  | 18 | 77.564 | 414.52 | -202.35 | 0 |
| NDUFA1   | chrX:119 + | 4896   | 3  | 53.78  | 289.35 | -62.249 | 0 |
| CHRD1    | chrX:109 - | 122203 | 17 | 3.1661 | 21.203 | -52.401 | 0 |
| POPDC2   | chr3:119 - | 35336  | 12 | 5.5728 | 34.091 | -48.126 | 0 |
| ECI2     | chr6:411 - | 19905  | 14 | 4.8299 | 30.141 | -38.702 | 0 |
| RASD2    | chr22:35 + | 12694  | 4  | 1.301  | 11.478 | -34.727 | 0 |
| OGN      | chr9:951 - | 20689  | 9  | 1.3715 | 11.891 | -35.629 | 0 |

Table S1

|          |            |        |    |        |        |         |   |
|----------|------------|--------|----|--------|--------|---------|---|
| KLHDC8B  | chr3:492 + | 4902   | 9  | 2.5814 | 18.645 | -38.949 | 0 |
| NCS1     | chr9:132 + | 64727  | 9  | 4.9414 | 31.612 | -69.417 | 0 |
| EMP3     | chr19:48 + | 5182   | 5  | 11.398 | 67.22  | -40.274 | 0 |
| DNAJB5   | chr9:349 + | 8793   | 6  | 1.7851 | 14.348 | -38.069 | 0 |
| CLIP3    | chr19:36 - | 18236  | 15 | 3.1046 | 21.676 | -49.985 | 0 |
| SECTM1   | chr17:80 - | 13022  | 5  | 2.3668 | 17.646 | -36.308 | 0 |
| PCSK7    | chr11:11 - | 27024  | 17 | 16.828 | 98.324 | -99.601 | 0 |
| PDLIM3   | chr4:186 - | 34898  | 10 | 4.2215 | 28.27  | -67.651 | 0 |
| GLIPR2   | chr9:361 + | 27162  | 13 | 2.9884 | 21.408 | -47.051 | 0 |
| LOC1005  | chr1:159 + | 17863  | 3  | 1.7171 | 14.273 | -23.586 | 0 |
| AK05519  | chr15:63 + | 2159   | 1  | 61.596 | 355.38 | -148.55 | 0 |
| UGT1A9   | chr2:234 + | 101408 | 7  | 1.1914 | 11.695 | -33.948 | 0 |
| MUC1     | chr1:155 - | 4407   | 36 | 8.0628 | 51.72  | -67.425 | 0 |
| WFDC2    | chr20:44 + | 11779  | 6  | 29.769 | 178.23 | -64.375 | 0 |
| ATP2B4   | chr1:203 + | 117295 | 24 | 8.2055 | 52.834 | -121.49 | 0 |
| ITIH5    | chr10:76 - | 107730 | 17 | 2.018  | 16.676 | -66.823 | 0 |
| KLF4     | chr9:110 - | 4915   | 8  | 7.3266 | 47.86  | -68.79  | 0 |
| UGT1A4   | chr2:234 + | 54514  | 6  | 1.3076 | 12.575 | -33.79  | 0 |
| SEMA3B   | chr3:503 + | 9533   | 29 | 1.6419 | 14.588 | -44.63  | 0 |
| MIR143H  | chr5:148 + | 25958  | 6  | 1.2507 | 12.293 | -20.817 | 0 |
| UGT1A5   | chr2:234 + | 60314  | 6  | 1.3172 | 12.714 | -33.8   | 0 |
| TNS1     | chr2:218 - | 203207 | 44 | 16.886 | 104.89 | -202.56 | 0 |
| UGT1A3   | chr2:234 + | 44179  | 6  | 1.3172 | 12.72  | -33.811 | 0 |
| UGT1A7   | chr2:234 + | 91368  | 6  | 1.3056 | 12.776 | -33.878 | 0 |
| ARHGEF2  | chr12:58 + | 7066   | 20 | 3.2407 | 24.42  | -50.099 | 0 |
| KCNMA1   | chr10:78 - | 768219 | 46 | 1.1639 | 12.107 | -87.026 | 0 |
| PDLIM7   | chr5:176 - | 14208  | 18 | 13.74  | 88.786 | -85.214 | 0 |
| EML1     | chr14:10 + | 204327 | 26 | 1.38   | 13.526 | -49.936 | 0 |
| ZNF575   | chr19:44 + | 10636  | 7  | 1.9207 | 16.903 | -40.183 | 0 |
| S100A14  | chr1:153 - | 2077   | 4  | 18.486 | 119.02 | -62.057 | 0 |
| ARL14    | chr3:160 + | 1288   | 1  | 1.0569 | 11.849 | -24.043 | 0 |
| JPH2     | chr20:42 - | 75882  | 7  | 1.8213 | 16.657 | -59.267 | 0 |
| HSPB7    | chr1:163 - | 5567   | 8  | 3.0812 | 24.723 | -53.029 | 0 |
| CES2     | chr16:66 + | 10648  | 15 | 11.974 | 81.06  | -103.28 | 0 |
| YIF1B    | chr19:38 - | 12407  | 15 | 5.8364 | 42.608 | -66.821 | 0 |
| UGT1A8   | chr2:234 + | 155661 | 6  | 1.2907 | 13.62  | -35.849 | 0 |
| SRPX     | chrX:380 - | 71590  | 10 | 1.3713 | 14.168 | -31.57  | 0 |
| EIF1AY   | chrY:227 + | 17430  | 7  | 1.5723 | 15.483 | -27.989 | 0 |
| GSTM4    | chr1:110 + | 9426   | 11 | 1.9962 | 18.228 | -39.403 | 0 |
| OCEL1    | chr19:17 + | 2974   | 6  | 2.2945 | 20.215 | -27.79  | 0 |
| SELM     | chr22:31 - | 2789   | 5  | 19.021 | 128.02 | -52.548 | 0 |
| CLU      | chr8:274 - | 17895  | 13 | 12.655 | 88.232 | -103.84 | 0 |
| REG4     | chr1:120 - | 17563  | 8  | 1.0854 | 12.638 | -33.084 | 0 |
| MYLK-AS  | chr3:123 + | 45264  | 3  | 3.559  | 29.013 | -27.339 | 0 |
| CITED2   | chr6:139 - | 2396   | 6  | 5.6477 | 43.059 | -54.895 | 0 |
| CHCHD1C  | chr22:24 - | 2121   | 4  | 21.583 | 149.32 | -56.759 | 0 |
| PLAC9    | chr10:81 + | 12527  | 4  | 1.879  | 18.191 | -21.05  | 0 |
| LGALS9C  | chr17:18 + | 18161  | 11 | 1.6021 | 16.412 | -32.25  | 0 |
| C7       | chr5:409 + | 73444  | 21 | 6.1403 | 46.806 | -79.795 | 0 |
| PPP1R14I | chr15:41 - | 13265  | 5  | 7.1825 | 54.023 | -39.369 | 0 |
| ACADS    | chr12:12 + | 14241  | 11 | 7.1165 | 54.025 | -60.556 | 0 |
| GNAO1    | chr16:56 + | 166106 | 11 | 0.664  | 10.343 | -57.987 | 0 |
| FAM129A  | chr1:184 - | 183560 | 21 | 3.4439 | 29.472 | -89.647 | 0 |

Table S1

|                      |        |    |        |        |         |   |
|----------------------|--------|----|--------|--------|---------|---|
| AB23171 chr11: 11 +  | 1324   | 2  | 5.7052 | 44.995 | -15.193 | 0 |
| S100B chr21: 48 -    | 6505   | 4  | 1.3942 | 15.438 | -26.761 | 0 |
| DKFZp66 chr22: 22 +  | 462276 | 2  | 92.488 | 641.76 | -197.15 | 0 |
| FOXF2 chr6: 139 +    | 5764   | 2  | 0.8439 | 11.695 | -31.988 | 0 |
| AOC3 chr17: 41 +     | 6947   | 6  | 9.7365 | 73.204 | -99.969 | 0 |
| TMEM37 chr2: 120 +   | 6651   | 2  | 0.9387 | 12.509 | -28.921 | 0 |
| SYNPO2 chr4: 119 +   | 172407 | 8  | 9.7441 | 74.018 | -183.57 | 0 |
| GREM2 chr1: 240 -    | 122590 | 4  | 0.7043 | 10.908 | -43.245 | 0 |
| CAV1 chr7: 115 +     | 271334 | 15 | 6.8103 | 54.672 | -91.189 | 0 |
| AK09830 chr20: 42 -  | 2308   | 1  | 2.4943 | 24.025 | -44.763 | 0 |
| PTN chr7: 136 -      | 116455 | 5  | 0.9534 | 13.059 | -28.371 | 0 |
| CADM3 chr1: 159 +    | 31556  | 12 | 0.5624 | 10.29  | -41.3   | 0 |
| FXVD6-F)chr11: 11 -  | 56957  | 12 | 2.0436 | 21.321 | -31.233 | 0 |
| Myopodir chr4: 119 + | 879    | 1  | 13.197 | 103.15 | -55.038 | 0 |
| ADIRF chr10: 88 +    | 2479   | 3  | 6.4101 | 53.798 | -35.255 | 0 |
| MYLK chr3: 123 -     | 272007 | 42 | 14.679 | 115    | -196.73 | 0 |
| ANGPTL1 chr1: 178 -  | 21546  | 9  | 0.7214 | 11.801 | -42.149 | 0 |
| MZB1 chr5: 138 -     | 2349   | 6  | 7.3665 | 61.408 | -43.75  | 0 |
| NKX2-3 chr10: 10 +   | 3591   | 2  | 0.9833 | 13.829 | -34.11  | 0 |
| CWH43 chr4: 489 +    | 75831  | 17 | 0.5299 | 10.54  | -34.376 | 0 |
| PHGR1 chr15: 40 +    | 5401   | 7  | 147.95 | 1124.4 | -128.26 | 0 |
| BTNL3 chr5: 180 +    | 17883  | 9  | 0.473  | 10.171 | -33.539 | 0 |
| ASB2 chr14: 94 -     | 42578  | 13 | 1.0644 | 14.678 | -52.096 | 0 |
| SCGN chr6: 256 +     | 49580  | 11 | 0.9054 | 13.676 | -28.717 | 0 |
| FOS chr14: 75 +      | 3457   | 5  | 21.977 | 176.86 | -119.62 | 0 |
| SMTN chr22: 31 +     | 23329  | 30 | 11.778 | 98.324 | -149.49 | 0 |
| LTBP4 chr19: 41 +    | 36654  | 44 | 5.1906 | 47.169 | -103.41 | 0 |
| WFDC1 chr16: 84 +    | 35050  | 9  | 3.5364 | 34.303 | -41.378 | 0 |
| AB23171 chr11: 11 +  | 1324   | 3  | 8.5652 | 73.517 | -25.094 | 0 |
| HHLA2 chr3: 108 +    | 81734  | 13 | 1.3159 | 17.116 | -43.466 | 0 |
| MOGAT2 chr11: 75 +   | 13398  | 9  | 0.5304 | 10.975 | -35.131 | 0 |
| PLIN4 chr19: 45 -    | 15525  | 9  | 3.0211 | 30.644 | -84.592 | 0 |
| CSRP1 chr1: 201 -    | 23730  | 11 | 32.427 | 262.12 | -225.88 | 0 |
| PI16 chr6: 369 +     | 16575  | 12 | 0.6319 | 11.906 | -37.341 | 0 |
| PLN chr6: 118 +      | 12146  | 4  | 4.9314 | 46.037 | -53.115 | 0 |
| CMBL chr5: 102 -     | 30462  | 6  | 2.0745 | 23.464 | -60.053 | 0 |
| GPT chr8: 145 +      | 3091   | 15 | 0.7033 | 12.651 | -34.034 | 0 |
| SELENBP chr1: 151 -  | 8433   | 15 | 29.492 | 244.61 | -140.94 | 0 |
| HRCT1 chr9: 359 +    | 950    | 1  | 1.3481 | 17.96  | -26.005 | 0 |
| AX74781 chr22: 31 +  | 2882   | 2  | 3.7022 | 37.296 | -59.725 | 0 |
| CRYAB chr11: 11 -    | 3124   | 4  | 7.0289 | 64.938 | -53.903 | 0 |
| TPSB2 chr16: 12 -    | 2914   | 12 | 2.9432 | 31.48  | -42.406 | 0 |
| RHOB chr2: 206 +     | 2367   | 1  | 20.927 | 181.41 | -122.28 | 0 |
| ALDH1A1 chr9: 755 -  | 179781 | 15 | 8.0011 | 74.008 | -80.307 | 0 |
| SDPR chr2: 192 -     | 12975  | 2  | 2.4806 | 28.086 | -58.886 | 0 |
| RNASE1 chr14: 21 -   | 1522   | 7  | 40.043 | 342.38 | -107.25 | 0 |
| CASQ2 chr1: 116 -    | 68801  | 11 | 2.0746 | 24.777 | -50.784 | 0 |
| DHRS11 chr17: 34 +   | 9008   | 7  | 4.7029 | 47.107 | -52.493 | 0 |
| CAPN9 chr1: 230 +    | 54620  | 20 | 0.6608 | 13.085 | -38.133 | 0 |
| FLNA chrX: 153 -     | 26107  | 48 | 120.76 | 1033   | -553.97 | 0 |
| PRPH chr12: 49 +     | 3573   | 9  | 0.5965 | 12.613 | -31.637 | 0 |
| HAND1 chr5: 153 -    | 3293   | 2  | 0.9631 | 15.744 | -33.67  | 0 |
| IGFBP6 chr12: 53 +   | 4693   | 4  | 4.5028 | 46.034 | -40.477 | 0 |

Table S1

|          |            |        |    |        |        |         |   |
|----------|------------|--------|----|--------|--------|---------|---|
| SDCBP2   | chr20:12 - | 19325  | 13 | 2.9274 | 32.574 | -54.032 | 0 |
| FOSB     | chr19:45 + | 7185   | 10 | 1.0144 | 16.257 | -56.679 | 0 |
| PNCK     | chrX:152 - | 17060  | 21 | 0.4645 | 11.59  | -40.411 | 0 |
| COX7A1   | chr19:36 - | 1948   | 4  | 3.151  | 34.81  | -31.631 | 0 |
| L1CAM    | chrX:153 - | 24660  | 31 | 0.4937 | 11.921 | -52.737 | 0 |
| RBPMS2   | chr15:65 - | 35676  | 8  | 1.6154 | 21.789 | -41.559 | 0 |
| MT1A     | chr16:56 + | 31522  | 5  | 16.925 | 156.87 | -56.963 | 0 |
| MAMDC2   | chr9:726 + | 183392 | 15 | 0.4251 | 11.625 | -43.402 | 0 |
| BCAS1    | chr20:52 - | 127226 | 15 | 1.8965 | 24.841 | -64.763 | 0 |
| TMEM35   | chrX:100 + | 17520  | 2  | 0.6146 | 13.465 | -34.828 | 0 |
| HSPA2    | chr14:65 + | 7332   | 3  | 3.5749 | 40.421 | -66.026 | 0 |
| ITM2C    | chr2:231 + | 14343  | 7  | 67.256 | 625.35 | -215.72 | 0 |
| GCNT3    | chr15:59 + | 8229   | 6  | 1.8582 | 25.302 | -48.817 | 0 |
| SLC26A2  | chr5:149 + | 26664  | 3  | 2.7581 | 33.833 | -103    | 0 |
| RGS2     | chr1:192 + | 3239   | 5  | 9.4712 | 96.264 | -69.135 | 0 |
| CES1     | chr16:55 - | 30312  | 16 | 2.0722 | 27.597 | -46.911 | 0 |
| TPSAB1   | chr16:12 + | 1878   | 7  | 2.7364 | 33.856 | -39.661 | 0 |
| MT2A     | chr16:56 + | 932    | 3  | 52.535 | 500.99 | -86.954 | 0 |
| RPS4Y1   | chrY:262 + | 114661 | 11 | 14.457 | 144.76 | -78.232 | 0 |
| NNAT     | chr20:36 + | 2484   | 3  | 1.8328 | 25.788 | -36.714 | 0 |
| SPDEF    | chr6:345 - | 18532  | 6  | 1.3864 | 21.715 | -41.32  | 0 |
| LIMS2    | chr2:128 - | 43365  | 19 | 3.6983 | 43.853 | -83.656 | 0 |
| TSPAN7   | chrX:384 + | 127442 | 11 | 1.9565 | 27.305 | -47.647 | 0 |
| CES3     | chr16:66 + | 13921  | 15 | 0.9856 | 18.085 | -57.5   | 0 |
| BCYRN1   | chrX:704 - | 518928 | 3  | 4.0633 | 47.668 | -18.143 | 0 |
| PIGR     | chr1:207 - | 17945  | 12 | 128.93 | 1252.7 | -450.25 | 0 |
| ENTPD8   | chr9:140 - | 7086   | 13 | 0.6641 | 15.247 | -40.611 | 0 |
| ADH1B    | chr4:100 - | 15046  | 13 | 2.16   | 30.216 | -75.54  | 0 |
| CD177    | chr19:43 + | 9656   | 14 | 2.7969 | 36.517 | -63.075 | 0 |
| TPSG1    | chr16:12 - | 3604   | 6  | 0.94   | 18.411 | -29.502 | 0 |
| ETHE1    | chr19:44 - | 20526  | 8  | 18.301 | 192.45 | -95.659 | 0 |
| AX74740  | chr11:11 - | 2544   | 1  | 4.1188 | 51.025 | -71.086 | 0 |
| C19orf33 | chr19:38 + | 843    | 5  | 20.67  | 220.93 | -65.51  | 0 |
| FXVD6    | chr11:11 - | 40511  | 11 | 5.3095 | 64.254 | -77.517 | 0 |
| LRRC26   | chr9:140 - | 1280   | 2  | 0.2428 | 11.888 | -25.873 | 0 |
| MRGPRF   | chr11:68 - | 8989   | 4  | 3.6348 | 48.551 | -66.305 | 0 |
| LDHD     | chr16:75 - | 4913   | 12 | 0.5431 | 15.652 | -38.223 | 0 |
| FLNC     | chr7:128 + | 28846  | 48 | 10.727 | 125.57 | -209.86 | 0 |
| RBFOX3   | chr17:77 - | 426804 | 18 | 0.1108 | 11.084 | -50.006 | 0 |
| FHL1     | chrX:135 + | 64658  | 20 | 8.1242 | 98.433 | -126.3  | 0 |
| CTSG     | chr14:25 - | 2743   | 5  | 0.2896 | 13.056 | -23.776 | 0 |
| SPINK4   | chr9:332 + | 8370   | 4  | 14.964 | 173.8  | -49.468 | 0 |
| CLCA4    | chr1:870 + | 33674  | 14 | 0.007  | 10.109 | -40.316 | 0 |
| PRIMA1   | chr14:94 - | 70123  | 6  | 0.2335 | 12.639 | -47.85  | 0 |
| SLPI     | chr20:43 - | 2328   | 4  | 6.2329 | 80.315 | -43.454 | 0 |
| CDC42EP  | chr19:54 - | 8213   | 3  | 8.0835 | 101.49 | -58.896 | 0 |
| SPIB     | chr19:50 + | 12115  | 8  | 0.2909 | 13.661 | -47.603 | 0 |
| CCDC69   | chr5:150 - | 43042  | 11 | 3.6965 | 52.447 | -93.831 | 0 |
| KCNMB1   | chr5:169 - | 11517  | 5  | 2.7185 | 41.469 | -65.951 | 0 |
| HSD11B2  | chr16:67 + | 6419   | 5  | 8.635  | 109.83 | -90.007 | 0 |
| HAND2    | chr4:174 - | 3727   | 5  | 1.2293 | 24.676 | -50.098 | 0 |
| PCP4     | chr21:41 + | 61976  | 3  | 4.3434 | 61.387 | -37.035 | 0 |
| TPM2     | chr9:356 - | 8064   | 13 | 85.239 | 1007   | -262.47 | 0 |

Table S1

|          |            |        |    |        |        |         |   |
|----------|------------|--------|----|--------|--------|---------|---|
| MMP28    | chr17:34 - | 39372  | 15 | 0.5372 | 17.013 | -48.827 | 0 |
| HBA1     | chr16:22 + | 842    | 3  | 2.6736 | 42.199 | -31.624 | 0 |
| ATP1A2   | chr1:160 + | 27855  | 27 | 0.5339 | 17.061 | -68.117 | 0 |
| SLC28A2  | chr15:45 + | 23705  | 18 | 0.3327 | 14.768 | -41.263 | 0 |
| SCGB2A1  | chr11:61 + | 5272   | 3  | 0      | 10.839 | -16.842 | 0 |
| DEFB1    | chr8:672 - | 7433   | 2  | 0.0482 | 11.438 | -16.203 | 0 |
| NDE1     | chr16:15 + | 83085  | 14 | 16.192 | 204.72 | -207.56 | 0 |
| PLAC8    | chr4:840 - | 24701  | 7  | 1.8219 | 33.122 | -53.549 | 0 |
| BCHE     | chr3:165 - | 64562  | 4  | 0.2462 | 14.192 | -40.648 | 0 |
| LYVE1    | chr11:10 - | 10953  | 6  | 1.3857 | 28.184 | -55.069 | 0 |
| HBB      | chr11:52 - | 1606   | 3  | 3.4573 | 53.88  | -37.204 | 0 |
| PTGS1    | chr9:125 + | 25174  | 18 | 2.0567 | 36.774 | -94.724 | 0 |
| TMEM171  | chr5:724 + | 11257  | 5  | 0.6117 | 19.146 | -33.188 | 0 |
| C10orf99 | chr10:85 + | 11497  | 3  | 16.083 | 212.97 | -83.547 | 0 |
| PGM5-AS  | chr9:709 - | 2649   | 2  | 0.1288 | 13.148 | -18.459 | 0 |
| HBA2     | chr16:22 + | 864    | 3  | 2.9882 | 49.209 | -35.145 | 0 |
| UGT2B15  | chr4:695 - | 24180  | 6  | 0.0494 | 12.247 | -37.035 | 0 |
| TMIGD1   | chr17:28 - | 17700  | 7  | 0.0424 | 12.178 | -26.957 | 0 |
| AKR1B10  | chr7:134 + | 13823  | 10 | 0.6293 | 19.637 | -37.734 | 0 |
| PSD      | chr10:10 - | 17318  | 22 | 0.9923 | 24.336 | -71.162 | 0 |
| TAGLN    | chr11:11 + | 5469   | 12 | 123.4  | 1594.4 | -420.71 | 0 |
| MFSD4    | chr1:205 + | 33935  | 11 | 0.2706 | 15.408 | -55.528 | 0 |
| CFD      | chr19:85 + | 3946   | 5  | 6.9539 | 101.72 | -69.096 | 0 |
| PCK1     | chr20:56 + | 5377   | 10 | 4.191  | 66.619 | -85.854 | 0 |
| PPP1R14  | chr19:38 - | 5355   | 4  | 3.4383 | 57.757 | -43.232 | 0 |
| DQ57504  | chr22:23 + | 1737   | 1  | 30.748 | 419.76 | -170.55 | 0 |
| IGLL5    | chr22:23 + | 8054   | 4  | 51.109 | 698.46 | -171.96 | 0 |
| LMOD1    | chr1:201 - | 50133  | 6  | 10.534 | 154.1  | -157.38 | 0 |
| C21orf88 | chr21:40 - | 15675  | 4  | 0.0204 | 12.737 | -37.354 | 0 |
| MAB21L2  | chr4:151 + | 2769   | 1  | 3.2253 | 57.364 | -81.768 | 0 |
| SCARA5   | chr8:277 - | 122971 | 10 | 0.2936 | 16.885 | -60.522 | 0 |
| FXYD3    | chr19:35 + | 8497   | 14 | 28.394 | 407.95 | -195.72 | 0 |
| LGALS4   | chr19:39 - | 11430  | 13 | 71.955 | 1035.6 | -292.74 | 0 |
| BEST4    | chr1:452 - | 4170   | 9  | 0.0834 | 14.783 | -39.105 | 0 |
| HSD17B2  | chr16:82 + | 63282  | 5  | 0.7826 | 25.053 | -40.451 | 0 |
| CHP2     | chr16:23 + | 4309   | 7  | 3.7066 | 67.88  | -82.432 | 0 |
| CHST5    | chr16:75 - | 16966  | 10 | 0.3827 | 19.551 | -56.664 | 0 |
| PLA2G2A  | chr1:203 - | 5009   | 8  | 7.6897 | 130.05 | -74.814 | 0 |
| DNASE1L  | chr3:581 - | 22501  | 13 | 0.2328 | 17.763 | -42.499 | 0 |
| SYNM     | chr15:99 + | 30515  | 8  | 11.66  | 193.75 | -243.51 | 0 |
| FXYD1    | chr19:35 + | 4223   | 9  | 0.7688 | 26.739 | -27.452 | 0 |
| HSPB8    | chr12:11 + | 15957  | 3  | 5.8988 | 107.27 | -95.263 | 0 |
| SLC51B   | chr15:65 + | 8027   | 4  | 0.2928 | 19.348 | -29.518 | 0 |
| CKB      | chr14:10 - | 3202   | 8  | 65.571 | 1063   | -253.37 | 0 |
| ST6GALN  | chr9:130 - | 20027  | 11 | 4.45   | 86.288 | -99.968 | 0 |
| SLC26A3  | chr7:107 - | 37767  | 22 | 5.1685 | 98.542 | -110.23 | 0 |
| C2orf40  | chr2:106 + | 12497  | 4  | 0.2203 | 18.988 | -26.819 | 0 |
| PI3      | chr20:43 + | 1646   | 3  | 0.9669 | 31.314 | -28.125 | 0 |
| HOXB13   | chr17:46 - | 3985   | 2  | 2.1687 | 51.116 | -82.607 | 0 |
| NXPE1    | chr11:11 - | 38144  | 12 | 0.16   | 18.095 | -50.532 | 0 |
| PGM5     | chr9:709 + | 174163 | 11 | 3.354  | 74.601 | -104.23 | 0 |
| DES      | chr2:220 + | 8363   | 9  | 143.3  | 2519.7 | -489.06 | 0 |
| MGAT4B   | chr5:179 - | 9355   | 17 | 2.4109 | 58.785 | -93.529 | 0 |

Table S1

|          |            |        |    |        |        |         |   |
|----------|------------|--------|----|--------|--------|---------|---|
| HSPB6    | chr19:36 - | 2464   | 3  | 11.141 | 213.31 | -115.23 | 0 |
| CNN1     | chr19:11 + | 11560  | 9  | 39.206 | 710.98 | -236.53 | 0 |
| CEACAM7  | chr19:42 - | 14862  | 7  | 4.2927 | 94.315 | -96.96  | 0 |
| AX74784  | chr16:15 + | 3498   | 1  | 17.638 | 335.73 | -223.74 | 0 |
| MYL9     | chr20:35 + | 8340   | 4  | 144.59 | 2647.6 | -366.7  | 0 |
| ADAMDE1  | chr8:242 + | 21729  | 15 | 4.182  | 93.498 | -99.756 | 0 |
| VSIG2    | chr11:12 - | 4740   | 8  | 5.5035 | 121.38 | -86.2   | 0 |
| CLEC3B   | chr3:450 + | 9805   | 3  | 2.3354 | 63.735 | -49.31  | 0 |
| MYH11    | chr16:15 - | 153896 | 50 | 58.711 | 1182.9 | -810.36 | 0 |
| TSPAN1   | chr1:466 + | 10886  | 9  | 14.828 | 314.01 | -148.87 | 0 |
| PADI2    | chr1:173 - | 52693  | 17 | 1.4189 | 47.365 | -99.783 | 0 |
| TACR2    | chr10:71 - | 12717  | 6  | 1.032  | 39.693 | -69.434 | 0 |
| CLDN8    | chr21:31 - | 2146   | 1  | 0      | 19.356 | -45.677 | 0 |
| BEST2    | chr19:12 + | 5865   | 9  | 0.1244 | 22.36  | -45.916 | 0 |
| LGALS2   | chr22:37 - | 9772   | 4  | 2.4944 | 73.744 | -41.94  | 0 |
| IL1R2    | chr2:102 + | 36579  | 12 | 0.9165 | 41.029 | -57.141 | 0 |
| Ig_alpha | chr14:10 - | 639    | 2  | 0.8337 | 39.916 | -25.966 | 0 |
| MT1X     | chr16:56 + | 1727   | 4  | 6.5598 | 168.15 | -64.693 | 0 |
| SPINK1   | chr5:147 - | 7118   | 4  | 5.3991 | 146.8  | -53.828 | 0 |
| LYPD8    | chr1:248 - | 435    | 1  | 3.0108 | 94.985 | -43.349 | 0 |
| ACTG2    | chr2:741 + | 26688  | 11 | 82.518 | 2009.5 | -474.87 | 0 |
| FABP1    | chr2:884 - | 5143   | 4  | 77.259 | 1912.2 | -218.37 | 0 |
| REP15    | chr12:27 + | 1139   | 1  | 0.3194 | 31.563 | -41.828 | 0 |
| DPT      | chr1:168 - | 33748  | 4  | 3.1659 | 105.26 | -91.192 | 0 |
| CA7      | chr16:66 + | 9768   | 8  | 0.0818 | 30.831 | -53.29  | 0 |
| HEPACAM1 | chr7:928 - | 37884  | 12 | 0.2921 | 38.382 | -65.345 | 0 |
| MUC2     | chr11:10 + | 29543  | 51 | 8.4994 | 322.94 | -359.38 | 0 |
| MT1H     | chr16:56 + | 1316   | 3  | 0.4498 | 51.998 | -31.768 | 0 |
| NXPE4    | chr11:11 - | 25172  | 7  | 1.0294 | 73.294 | -87.304 | 0 |
| MT1F     | chr16:56 + | 1361   | 3  | 2.6869 | 134.47 | -52.897 | 0 |
| GUCA2B   | chr1:426 + | 2404   | 3  | 0.0374 | 37.521 | -33.491 | 0 |
| ADH1C    | chr4:100 - | 16269  | 10 | 3.0492 | 167.88 | -108.23 | 0 |
| MT1M     | chr16:56 + | 16526  | 4  | 1.4922 | 105.62 | -53.79  | 0 |
| FW34004  | chr8:863 + | 2277   | 1  | 0.4442 | 62.723 | -83.771 | 0 |
| IGJ      | chr4:715 - | 11091  | 5  | 25.378 | 1197.6 | -286.63 | 0 |
| MS4A12   | chr11:60 + | 14651  | 9  | 0.0383 | 46.637 | -63.873 | 0 |
| CA4      | chr17:58 + | 20959  | 9  | 0.0891 | 51.046 | -61.91  | 0 |
| CHGA     | chr14:93 + | 12194  | 8  | 5.0532 | 299.9  | -170.92 | 0 |
| ST6GALN1 | chr17:74 - | 19050  | 10 | 1.8039 | 150.86 | -139.92 | 0 |
| MT1E     | chr16:56 + | 1440   | 4  | 5.7674 | 387.59 | -126    | 0 |
| AQP8     | chr16:25 + | 11969  | 6  | 0.367  | 80.355 | -72.145 | 0 |
| FCGBP    | chr19:40 - | 86571  | 36 | 1.7822 | 168.65 | -367.01 | 0 |
| UGT2B17  | chr4:694 - | 31343  | 6  | 0.471  | 101.33 | -102.06 | 0 |
| CA2      | chr8:863 + | 17591  | 7  | 2.0719 | 225.25 | -135.36 | 0 |
| B3GNT7   | chr2:232 + | 5541   | 2  | 0.548  | 116.32 | -144.49 | 0 |
| GCG      | chr2:162 - | 9536   | 6  | 0.345  | 105.09 | -82.23  | 0 |
| GUCA2A   | chr1:426 - | 2034   | 3  | 4.2208 | 424.47 | -109.03 | 0 |
| INSL5    | chr1:672 - | 3519   | 2  | 0.0417 | 96.851 | -59.062 | 0 |
| ITLN1    | chr1:160 - | 8631   | 8  | 3.4791 | 472.95 | -165.7  | 0 |
| IGH@     | chr14:10 - | 277245 | 4  | 32.941 | 3959.9 | -466.07 | 0 |
| PYY      | chr17:42 - | 51731  | 9  | 0.5485 | 184.25 | -104.03 | 0 |
| MT1G     | chr16:56 - | 1325   | 4  | 2.2375 | 400.1  | -88.774 | 0 |
| SST      | chr3:187 - | 1508   | 2  | 0.0353 | 143.67 | -67.51  | 0 |

Table S1

|       |            |       |    |        |        |         |   |
|-------|------------|-------|----|--------|--------|---------|---|
| CLCA1 | chr1:869 + | 31580 | 16 | 0.2248 | 546.97 | -298.93 | 0 |
| ZG16  | chr16:29 + | 3409  | 4  | 0.0741 | 528.92 | -219.16 | 0 |
| CA1   | chr8:862 - | 49885 | 12 | 0.0654 | 632.97 | -216.25 | 0 |



Table S1

ns from RNA-seq of the paired CRC/control mucosa  
 ≥ RPKM value of CRC sample versus the RPKM value of  
 st be <0.05 (Wald score >1.96). Normalized reads from  
 ldStat).

- 149.38 Homo sapiens cystatin SN (CST1), mRNA.
- 66.446 Homo sapiens dipeptidase 1 (renal) (DPEP1), mRNA.
- 48.489 Homo sapiens carbonic anhydrase IX (CA9), mRNA.
- 35.698 Homo sapiens ets variant 4 (ETV4), mRNA.
- 30.013 Homo sapiens claudin 1 (CLDN1), mRNA.
- 26.335 Homo sapiens sulfotransferase family, cytosolic, 1C, member 4 (SULT1C4), r
- 22.99 Homo sapiens regenerating islet-derived 1 alpha (REG1A), mRNA.
- 20.91 Homo sapiens cartilage oligomeric matrix protein (COMP), mRNA.
- 20.706 Homo sapiens naked cuticle homolog 1 (Drosophila) (NKD1), mRNA.
- 16.555 Homo sapiens carcinoembryonic antigen-related cell adhesion molecule 6 (nc
- 16.081 Homo sapiens glutamic pyruvate transaminase (alanine aminotransferase) 2
- 16.002 Homo sapiens metastasis associated in colon cancer 1 (MACC1), mRNA.
- 15.723 Homo sapiens homeobox B8 (HOXB8), mRNA.
- 14.213 Homo sapiens chromosome 6 open reading frame 223 (C6orf223), mRNA.
- 11.999 Homo sapiens leucine-rich repeat containing G protein-coupled receptor 5 (L
- 11.888 Homo sapiens teratocarcinoma-derived growth factor 1 (TDGF1), mRNA.
- 11.695 Homo sapiens frizzled family receptor 10 (FZD10), mRNA.
- 11.596 Homo sapiens calcitonin-related polypeptide alpha (CALCA), mRNA.
- 11.018 Homo sapiens forkhead box Q1 (FOXQ1), mRNA.
- 11.016 Homo sapiens granzyme B (granzyme 2, cytotoxic T-lymphocyte-associated
- 10.897 Homo sapiens cytochrome P450, family 2, subfamily B, polypeptide 6 (CYP2E
- 10.784 Homo sapiens matrix metalloproteinase 1 (interstitial collagenase) (MMP1), r
- 10.731 Homo sapiens putative uncharacterized protein FLJ22184 (FLJ22184), mRNA
- 10.569 Homo sapiens nuclear factor (erythroid-derived 2)-like 3 (NFE2L3), mRNA.
- 10.449 Homo sapiens nebulin (NEBL), mRNA.
- 10.25 Homo sapiens tescalcin (TESC), non-coding RNA.
- 9.4201 Homo sapiens serum amyloid A1 (SAA1), mRNA.
- 9.239 Homo sapiens collagen triple helix repeat containing 1 (CTHRC1), mRNA.
- 9.1053 Homo sapiens prospero homeobox 1 (PROX1), mRNA.
- 9.0727 Homo sapiens MLX interacting protein-like (MLXIPL), mRNA.
- 8.9043 Homo sapiens olfactory receptor, family 51, subfamily E, member 1 (OR51E1
- 8.4671 Homo sapiens TOX high mobility group box family member 3 (TOX3), mRNA
- 8.0536 Homo sapiens tribbles homolog 3 (Drosophila) (TRIB3), mRNA.
- 8.0259 Homo sapiens hypoxia inducible lipid droplet-associated (HILPDA), mRNA.
- 7.55 Homo sapiens cDNA FLJ32352 fis, clone PROST2007389, moderately similar
- 7.5325 Homo sapiens solute carrier family 6 (neurotransmitter transporter, taurine),
- 7.3822 Homo sapiens glutamate receptor, metabotropic 8 (GRM8), non-coding RNA.
- 7.1579 Homo sapiens cDNA FLJ43320 fis, clone NT2RI2024935.
- 7.0609 Homo sapiens ubiquitin D (UBD), mRNA.
- 7.0412 Homo sapiens ATH1, acid trehalase-like 1 (yeast) (ATHL1), mRNA.
- 6.9643 Homo sapiens ADP-ribosylation factor-like 5B (ARL5B), mRNA.
- 6.8498 Homo sapiens cell division cycle associated 7 (CDCA7), mRNA.
- 6.8092 Homo sapiens thrombospondin 2 (THBS2), mRNA.
- 6.8071 Homo sapiens vascular endothelial growth factor A (VEGFA), mRNA.
- 6.7389 Homo sapiens homeobox B9 (HOXB9), mRNA.
- 6.6582 Homo sapiens SRY (sex determining region Y)-box 4 (SOX4), mRNA.
- 6.6362 Homo sapiens proprotein convertase subtilisin/kexin type 1 (PCSK1), mRNA.
- 6.4957 Homo sapiens alpha-2-glycoprotein 1, zinc-binding (AZGP1), mRNA.

Table S1

6.3625 Homo sapiens ATP-binding cassette, sub-family B (MDR/TAP), member 1 (AE  
6.0947 Homo sapiens, clone IMAGE: 3923347, mRNA.  
6.0816 Homo sapiens epithelial cell transforming sequence 2 oncogene (ECT2), mRNA  
6.0133 Homo sapiens heat shock 105kDa/110kDa protein 1 (HSPH1), mRNA.  
5.9795 Homo sapiens SHC SH2-domain binding protein 1 (SHCBP1), mRNA.  
5.9512 Homo sapiens FGGY carbohydrate kinase domain containing (FGGY), non-coc  
5.9495 Homo sapiens origin recognition complex, subunit 6 (ORC6), non-coding RNA  
5.9173 Homo sapiens cDNA FLJ42239 fis, clone TKIDN2002329.  
5.9172 Homo sapiens vacuolar protein sorting 35 homolog (S. cerevisiae) (VPS35), mRNA  
5.8959 Homo sapiens angiotensin I converting enzyme (peptidyl-dipeptidase A) 2 (ACE2)  
5.893 Homo sapiens phospholipase C, beta 4 (PLCB4), mRNA.  
5.8726 Homo sapiens caspase recruitment domain family, member 11 (CARD11), mRNA  
5.8715 Homo sapiens secreted phosphoprotein 1 (SPP1), mRNA.  
5.8549 Homo sapiens alpha-kinase 3 (ALPK3), mRNA.  
5.7838 Homo sapiens GTF2I repeat domain containing 1 (GTF2IRD1), mRNA.  
5.7591 Homo sapiens chromosome 6 open reading frame 222 (C6orf222), mRNA.  
5.6395 Homo sapiens anillin, actin binding protein (ANLN), mRNA.  
5.5751 Homo sapiens SKI-like oncogene (SKIL), mRNA.  
5.5659 Homo sapiens pseudouridylate synthase 7 homolog (S. cerevisiae) (PUS7), mRNA  
5.5248 Homo sapiens pleckstrin homology-like domain, family A, member 1 (PHLDA1)  
5.5085 Homo sapiens neuronal pentraxin II (NPTX2), mRNA.  
5.4831 Homo sapiens LIM domain 7 (LMO7), mRNA.  
5.4647 Homo sapiens exportin 5 (XPO5), mRNA.  
5.3805 Homo sapiens E2F transcription factor 3 (E2F3), mRNA.  
5.3507 Homo sapiens nucleoporin 153kDa (NUP153), mRNA.  
5.3071 Homo sapiens secreted frizzled-related protein 4 (SFRP4), mRNA.  
5.3002 Homo sapiens fibroblast growth factor receptor-like 1 (FGFRL1), mRNA.  
5.2214 Homo sapiens SRSF protein kinase 1 (SRPK1), non-coding RNA.  
5.1383 Homo sapiens laminin, gamma 2 (LAMC2), mRNA.  
5.1213 Homo sapiens cDNA FLJ12853 fis, clone NT2RP2003456.  
5.0828 Homo sapiens brevican, mRNA (cDNA clone IMAGE: 3618761), with apparent  
0.1981 Homo sapiens sorbin and SH3 domain containing 1 (SORBS1), mRNA.  
0.1978 Homo sapiens related RAS viral (r-ras) oncogene homolog (RRAS), mRNA.  
0.1978 Homo sapiens thrombospondin 4 (THBS4), mRNA.  
0.1974 Homo sapiens retinoic acid receptor responder (tazarotene induced) 3 (RARR3)  
0.1972 Homo sapiens gelsolin (GSN), mRNA.  
0.1965 Homo sapiens fatty acid hydroxylase domain containing 2 (FAXDC2), mRNA.  
0.1963 Homo sapiens chemokine (C-C motif) ligand 15 (CCL15), mRNA.  
0.1961 Homo sapiens family with sequence similarity 162, member A (FAM162A), mRNA  
0.1939 Homo sapiens solute carrier family 25 (mitochondrial carrier; adenine nucleoside  
0.1937 Homo sapiens biliverdin reductase B (flavin reductase (NADPH)) (BLVRB), mRNA  
0.1933 Homo sapiens Kruppel-like factor 2 (lung) (KLF2), mRNA.  
0.1921 Homo sapiens RGM domain family, member A (RGMA), mRNA.  
0.1913 Homo sapiens interferon, alpha-inducible protein 6 (IFI6), mRNA.  
0.1903 Homo sapiens CD79a molecule, immunoglobulin-associated alpha (CD79A), mRNA  
0.1892 Homo sapiens transforming growth factor beta 1 induced transcript 1 (TGFB1-IT1)  
0.1891 Homo sapiens tropomyosin 1 (alpha) (TPM1), mRNA.  
0.1887 Homo sapiens NADH dehydrogenase (ubiquinone) 1 alpha subcomplex, 1, 7, 7L  
0.1876 Homo sapiens chordin-like 1 (CHRDL1), mRNA.  
0.1873 Homo sapiens popeye domain containing 2 (POPDC2), mRNA.  
0.1872 Homo sapiens enoyl-CoA delta isomerase 2 (ECI2), non-coding RNA.  
0.1844 Homo sapiens RASD family, member 2 (RASD2), mRNA.  
0.184 Homo sapiens osteoglycin (OGN), mRNA.

Table S1

0.1823 Homo sapiens kelch domain containing 8B (KLHDC8B), mRNA.  
 0.1822 Homo sapiens neuronal calcium sensor 1 (NCS1), mRNA.  
 0.1817 Homo sapiens epithelial membrane protein 3 (EMP3), mRNA.  
 0.1815 Homo sapiens DnaJ (Hsp40) homolog, subfamily B, member 5 (DNAJB5), mRNA.  
 0.181 Homo sapiens CAP-GLY domain containing linker protein 3 (CLIP3), mRNA.  
 0.1806 Homo sapiens secreted and transmembrane 1 (SECTM1), mRNA.  
 0.1795 Homo sapiens proprotein convertase subtilisin/kexin type 7 (PCSK7), mRNA.  
 0.1784 Homo sapiens PDZ and LIM domain 3 (PDLIM3), non-coding RNA.  
 0.178 Homo sapiens GLI pathogenesis-related 2 (GLIPR2), mRNA.  
 0.1779 Homo sapiens uncharacterized LOC100505633 (LOC100505633), non-coding RNA.  
 0.1756 Homo sapiens mRNA for TPM1 protein variant protein.  
 0.1726 Homo sapiens UDP glucuronosyltransferase 1 family, polypeptide A9 (UGT1A9), mRNA.  
 0.1719 Homo sapiens mucin 1, cell surface associated (MUC1), mRNA.  
 0.1717 Homo sapiens WAP four-disulfide core domain 2 (WFDC2), mRNA.  
 0.171 Homo sapiens ATPase, Ca++ transporting, plasma membrane 4 (ATP2B4), mRNA.  
 0.1707 Homo sapiens inter-alpha-trypsin inhibitor heavy chain family, member 5 (ITIH5), mRNA.  
 0.1704 Homo sapiens Kruppel-like factor 4 (gut) (KLF4), mRNA.  
 0.17 Homo sapiens UDP glucuronosyltransferase 1 family, polypeptide A4 (UGT1A4), mRNA.  
 0.1695 Homo sapiens sema domain, immunoglobulin domain (Ig), short basic domain (semaphorin) 4B (SEMA4B), mRNA.  
 0.1693 Homo sapiens MIR143 host gene (non-protein coding) (MIR143HG), non-coding RNA.  
 0.169 Homo sapiens UDP glucuronosyltransferase 1 family, polypeptide A5 (UGT1A5), mRNA.  
 0.1689 Homo sapiens tensin 1 (TNS1), mRNA.  
 0.1689 Homo sapiens UDP glucuronosyltransferase 1 family, polypeptide A3 (UGT1A3), mRNA.  
 0.1674 Homo sapiens UDP glucuronosyltransferase 1 family, polypeptide A7 (UGT1A7), mRNA.  
 0.1668 Homo sapiens Rho guanine nucleotide exchange factor (GEF) 25 (ARHGEF25), mRNA.  
 0.1651 Homo sapiens potassium large conductance calcium-activated channel, subfamily D, member 1 (KCNN1), mRNA.  
 0.1642 Homo sapiens PDZ and LIM domain 7 (enigma) (PDLIM7), mRNA.  
 0.1638 Homo sapiens echinoderm microtubule associated protein like 1 (EML1), mRNA.  
 0.1631 Homo sapiens zinc finger protein 575 (ZNF575), mRNA.  
 0.1624 Homo sapiens S100 calcium binding protein A14 (S100A14), mRNA.  
 0.1601 Homo sapiens ADP-ribosylation factor-like 14 (ARL14), mRNA.  
 0.1598 Homo sapiens junctophilin 2 (JPH2), mRNA.  
 0.1587 Homo sapiens heat shock 27kDa protein family, member 7 (cardiovascular) (HSP27), mRNA.  
 0.1581 Homo sapiens carboxylesterase 2 (CES2), non-coding RNA.  
 0.1568 Homo sapiens Yip1 interacting factor homolog B (S. cerevisiae) (YIF1B), mRNA.  
 0.1567 Homo sapiens UDP glucuronosyltransferase 1 family, polypeptide A8 (UGT1A8), mRNA.  
 0.1563 Homo sapiens sushi-repeat containing protein, X-linked (SRPX), mRNA.  
 0.1561 Homo sapiens eukaryotic translation initiation factor 1A, Y-linked (EIF1AY), mRNA.  
 0.1558 Homo sapiens glutathione S-transferase mu 4 (GSTM4), non-coding RNA.  
 0.1553 Homo sapiens occludin/ELL domain containing 1 (OCEL1), mRNA.  
 0.1552 Homo sapiens selenoprotein M (SELM), mRNA.  
 0.153 Homo sapiens clusterin (CLU), non-coding RNA.  
 0.1529 Homo sapiens regenerating islet-derived family, member 4 (REG4), mRNA.  
 0.1519 Homo sapiens MYLK antisense RNA 1 (MYLK-AS1), non-coding RNA.  
 0.1509 Homo sapiens Cbp/p300-interacting transactivator, with Glu/Asp-rich carboxy-terminal domain 1 (CITED1), mRNA.  
 0.1502 Homo sapiens coiled-coil-helix-coiled-coil-helix domain containing 10 (CHCHD10), mRNA.  
 0.15 Homo sapiens placenta-specific 9 (PLAC9), mRNA.  
 0.1494 Homo sapiens lectin, galactoside-binding, soluble, 9C (LGALS9C), mRNA.  
 0.1494 Homo sapiens complement component 7 (C7), mRNA.  
 0.1487 Homo sapiens protein phosphatase 1, regulatory (inhibitor) subunit 14D (PPP1R14D), mRNA.  
 0.1475 Homo sapiens acyl-CoA dehydrogenase, C-2 to C-3 short chain (ACADS), nuclear DNA.  
 0.1467 Homo sapiens guanine nucleotide binding protein (G protein), alpha activating activity 11 (GNAO1), mRNA.  
 0.1458 Homo sapiens family with sequence similarity 129, member A (FAM129A), mRNA.

Table S1

0.1458 Homo sapiens mRNA for hypothetical protein, partial cds, clone:Hsa11-digit0  
0.1456 Homo sapiens S100 calcium binding protein B (S100B), mRNA.  
0.1454 Homo sapiens cDNA FLJ43597 fis, clone SMINT2015787, moderately similar  
0.1452 Homo sapiens forkhead box F2 (FOXF2), mRNA.  
0.1447 Homo sapiens amine oxidase, copper containing 3 (AOC3), non-coding RNA.  
0.1435 Homo sapiens transmembrane protein 37 (TMEM37), mRNA.  
0.1432 Homo sapiens synaptopodin 2 (SYNPO2), mRNA.  
0.1431 Homo sapiens gremlin 2, DAN family BMP antagonist (GREM2), mRNA.  
0.1403 Homo sapiens caveolin 1, caveolae protein, 22kDa (CAV1), mRNA.  
0.1396 Homo sapiens cDNA FLJ40969 fis, clone UTERU2012688.  
0.139 Homo sapiens pleiotrophin (PTN), mRNA.  
0.1384 Homo sapiens cell adhesion molecule 3 (CADM3), mRNA.  
0.1364 Homo sapiens FXVD6-FXVD2 readthrough (FXVD6-FXVD2), mRNA.  
0.1363 Homo sapiens mRNA for myopodin.  
0.1352 Homo sapiens adipogenesis regulatory factor (ADIRF), mRNA.  
0.1352 Homo sapiens myosin light chain kinase (MYLK), mRNA.  
0.1345 Homo sapiens angiopoietin-like 1 (ANGPTL1), mRNA.  
0.1341 Homo sapiens marginal zone B and B1 cell-specific protein (MZB1), mRNA.  
0.1337 Homo sapiens NK2 homeobox 3 (NKX2-3), mRNA.  
0.1326 Homo sapiens cell wall biogenesis 43 C-terminal homolog (*S. cerevisiae*) (CV  
0.1323 Homo sapiens proline/histidine/glycine-rich 1 (PHGR1), mRNA.  
0.1319 Homo sapiens butyrophilin-like 3 (BTNL3), mRNA.  
0.1317 Homo sapiens ankyrin repeat and SOCS box containing 2 (ASB2), mRNA.  
0.1298 Homo sapiens secretagogen, EF-hand calcium binding protein (SCGN), mRNA  
0.1292 Homo sapiens FBJ murine osteosarcoma viral oncogene homolog (FOS), mRNA  
0.1287 Homo sapiens smoothelin (SMTN), mRNA.  
0.1285 Homo sapiens latent transforming growth factor beta binding protein 4 (LTBF  
0.1285 Homo sapiens WAP four-disulfide core domain 1 (WFDC1), mRNA.  
0.1284 Homo sapiens mRNA for hypothetical protein, partial cds, clone:Hsa11-digit0  
0.1278 Homo sapiens HERV-H LTR-associating 2 (HHLA2), mRNA.  
0.1278 Homo sapiens monoacylglycerol O-acyltransferase 2 (MOGAT2), mRNA.  
0.1271 Homo sapiens perilipin 4 (PLIN4), mRNA.  
0.127 Homo sapiens cysteine and glycine-rich protein 1 (CSR1), mRNA.  
0.1264 Homo sapiens peptidase inhibitor 16 (PI16), mRNA.  
0.1261 Homo sapiens phospholamban (PLN), mRNA.  
0.1257 Homo sapiens carboxymethylenebutenolidase homolog (*Pseudomonas*) (CME  
0.1248 Homo sapiens glutamic-pyruvate transaminase (alanine aminotransferase) (A  
0.1242 Homo sapiens selenium binding protein 1 (SELENBP1), mRNA.  
0.1238 Homo sapiens histidine rich carboxyl terminus 1 (HRCT1), mRNA.  
0.1228 Homo sapiens cDNA FLJ35168 fis, clone PLACE6012604.  
0.1218 Homo sapiens crystallin, alpha B (CRYAB), mRNA.  
0.1214 Homo sapiens tryptase beta 2 (gene/pseudogene) (TPSB2), mRNA.  
0.1202 Homo sapiens ras homolog family member B (RHOB), mRNA.  
0.12 Homo sapiens aldehyde dehydrogenase 1 family, member A1 (ALDH1A1), mi  
0.1197 Homo sapiens serum deprivation response (SDPR), mRNA.  
0.1195 Homo sapiens ribonuclease, RNase A family, 1 (pancreatic) (RNASE1), mRNA  
0.1193 Homo sapiens calsequestrin 2 (cardiac muscle) (CASQ2), nuclear gene encod  
0.1185 Homo sapiens dehydrogenase/reductase (SDR family) member 11 (DHRS11)  
0.1179 Homo sapiens calpain 9 (CAPN9), mRNA.  
0.1178 Homo sapiens filamin A, alpha (FLNA), mRNA.  
0.1173 Homo sapiens peripherin (PRPH), mRNA.  
0.1172 Homo sapiens heart and neural crest derivatives expressed 1 (HAND1), mRNA  
0.117 Homo sapiens insulin-like growth factor binding protein 6 (IGFBP6), mRNA.

Table S1

0.117 Homo sapiens syndecan binding protein (syntenin) 2 (SDCBP2), mRNA.  
 0.1167 Homo sapiens FBJ murine osteosarcoma viral oncogene homolog B (FOSB), r  
 0.1163 Homo sapiens pregnancy up-regulated non-ubiquitously expressed CaM kina  
 0.1159 Homo sapiens cytochrome c oxidase subunit VIIa polypeptide 1 (muscle) (CC  
 0.1156 Homo sapiens L1 cell adhesion molecule (L1CAM), mRNA.  
 0.1148 Homo sapiens RNA binding protein with multiple splicing 2 (RBPM5), mRNA  
 0.1135 Homo sapiens metallothionein 1A (MT1A), mRNA.  
 0.1129 Homo sapiens MAM domain containing 2 (MAMDC2), mRNA.  
 0.1121 Homo sapiens breast carcinoma amplified sequence 1 (BCAS1), mRNA.  
 0.1116 Homo sapiens transmembrane protein 35 (TMEM35), mRNA.  
 0.1104 Homo sapiens heat shock 70kDa protein 2 (HSPA2), mRNA.  
 0.109 Homo sapiens integral membrane protein 2C (ITM2C), mRNA.  
 0.1087 Homo sapiens glucosaminyl (N-acetyl) transferase 3, mucin type (GCNT3), r  
 0.1079 Homo sapiens solute carrier family 26 (sulfate transporter), member 2 (SLC2  
 0.1077 Homo sapiens regulator of G-protein signaling 2, 24kDa (RGS2), mRNA.  
 0.1074 Homo sapiens carboxylesterase 1 (CES1), mRNA.  
 0.1072 Homo sapiens tryptase alpha/beta 1 (TPSAB1), mRNA.  
 0.1066 Homo sapiens metallothionein 2A (MT2A), mRNA.  
 0.106 Homo sapiens ribosomal protein S4, Y-linked 1 (RPS4Y1), mRNA.  
 0.1057 Homo sapiens neuronatin (NNAT), mRNA.  
 0.1051 Homo sapiens SAM pointed domain containing ets transcription factor (SPDE  
 0.1047 Homo sapiens LIM and senescent cell antigen-like domains 2 (LIMS2), mRNA  
 0.1045 Homo sapiens tetraspanin 7 (TSPAN7), mRNA.  
 0.104 Homo sapiens carboxylesterase 3 (CES3), mRNA.  
 0.104 Homo sapiens brain cytoplasmic RNA 1 (BCYRN1), non-coding RNA.  
 0.1036 Homo sapiens polymeric immunoglobulin receptor (PIGR), mRNA.  
 0.1024 Homo sapiens ectonucleoside triphosphate diphosphohydrolase 8 (ENTPD8),  
 0.1012 Homo sapiens alcohol dehydrogenase 1B (class I), beta polypeptide (ADH1B),  
 0.1012 Homo sapiens CD177 molecule (CD177), mRNA.  
 0.0999 Homo sapiens tryptase gamma 1 (TPSG1), mRNA.  
 0.0998 Homo sapiens ethylmalonic encephalopathy 1 (ETHE1), nuclear gene encodir  
 0.0984 Homo sapiens cDNA FLJ30827 fis, clone FEBRA2001745.  
 0.0976 Homo sapiens chromosome 19 open reading frame 33 (C19orf33), mRNA.  
 0.0967 Homo sapiens FXD domain containing ion transport regulator 6 (FXD6), m  
 0.0964 Homo sapiens leucine rich repeat containing 26 (LRRC26), mRNA.  
 0.0935 Homo sapiens MAS-related GPR, member F (MRGPRF), mRNA.  
 0.0927 Homo sapiens lactate dehydrogenase D (LDHD), nuclear gene encoding mito  
 0.0927 Homo sapiens filamin C, gamma (FLNC), mRNA.  
 0.0919 Homo sapiens RNA binding protein, fox-1 homolog (C. elegans) 3 (RBFOX3),  
 0.0918 Homo sapiens four and a half LIM domains 1 (FHL1), non-coding RNA.  
 0.0917 Homo sapiens cathepsin G (CTSG), mRNA.  
 0.0913 Homo sapiens serine peptidase inhibitor, Kazal type 4 (SPINK4), mRNA.  
 0.0906 Homo sapiens chloride channel accessory 4 (CLCA4), non-coding RNA.  
 0.0904 Homo sapiens proline rich membrane anchor 1 (PRIMA1), mRNA.  
 0.0889 Homo sapiens secretory leukocyte peptidase inhibitor (SLPI), mRNA.  
 0.0886 Homo sapiens CDC42 effector protein (Rho GTPase binding) 5 (CDC42EP5), r  
 0.0881 Homo sapiens Spi-B transcription factor (Spi-1/PU.1 related) (SPIB), mRNA.  
 0.0879 Homo sapiens coiled-coil domain containing 69 (CCDC69), mRNA.  
 0.0876 Homo sapiens potassium large conductance calcium-activated channel, subfa  
 0.0869 Homo sapiens hydroxysteroid (11-beta) dehydrogenase 2 (HSD11B2), mRNA  
 0.0868 Homo sapiens heart and neural crest derivatives expressed 2 (HAND2), mRN  
 0.0856 Homo sapiens Purkinje cell protein 4 (PCP4), mRNA.  
 0.0856 Homo sapiens tropomyosin 2 (beta) (TPM2), mRNA.

Table S1

0.0853 Homo sapiens matrix metalloproteinase 28 (MMP28), mRNA.  
 0.085 Homo sapiens hemoglobin, alpha 1 (HBA1), mRNA.  
 0.0849 Homo sapiens ATPase, Na<sup>+</sup>/K<sup>+</sup> transporting, alpha 2 polypeptide (ATP1A2),  
 0.0845 Homo sapiens solute carrier family 28 (sodium-coupled nucleoside transport)  
 0.0845 Homo sapiens secretoglobin, family 2A, member 1 (SCGB2A1), mRNA.  
 0.0843 Homo sapiens defensin, beta 1 (DEFB1), mRNA.  
 0.0836 Homo sapiens nudE nuclear distribution E homolog 1 (A. nidulans) (NDE1), r  
 0.0827 Homo sapiens placenta-specific 8 (PLAC8), mRNA.  
 0.082 Homo sapiens butyrylcholinesterase (BCHE), mRNA.  
 0.0817 Homo sapiens lymphatic vessel endothelial hyaluronan receptor 1 (LYVE1), n  
 0.0812 Homo sapiens hemoglobin, beta (HBB), mRNA.  
 0.0809 Homo sapiens prostaglandin-endoperoxide synthase 1 (prostaglandin G/H sy  
 0.08 Homo sapiens transmembrane protein 171 (TMEM171), mRNA.  
 0.0798 Homo sapiens chromosome 10 open reading frame 99 (C10orf99), mRNA.  
 0.0798 Homo sapiens PGM5 antisense RNA 1 (PGM5-AS1), non-coding RNA.  
 0.0794 Homo sapiens hemoglobin, alpha 2 (HBA2), mRNA.  
 0.0792 Homo sapiens UDP glucuronosyltransferase 2 family, polypeptide B15 (UGT2  
 0.0791 Homo sapiens transmembrane and immunoglobulin domain containing 1 (TM  
 0.0789 Homo sapiens aldo-keto reductase family 1, member B10 (aldose reductase)  
 0.0786 Homo sapiens pleckstrin and Sec7 domain containing (PSD), non-coding RNA  
 0.078 Homo sapiens transgelin (TAGLN), mRNA.  
 0.0774 Homo sapiens major facilitator superfamily domain containing 4 (MFSD4), m  
 0.0774 Homo sapiens complement factor D (adipsin) (CFD), mRNA.  
 0.0768 Homo sapiens phosphoenolpyruvate carboxykinase 1 (soluble) (PCK1), mRNA  
 0.0755 Homo sapiens protein phosphatase 1, regulatory (inhibitor) subunit 14A (PPF  
 0.0755 Homo sapiens cDNA FLJ32612 fis, clone STOMA2000088, highly similar to IG  
 0.0745 Homo sapiens immunoglobulin lambda-like polypeptide 5 (IGLL5), mRNA.  
 0.0744 Homo sapiens leiomodulin 1 (smooth muscle) (LMOD1), mRNA.  
 0.0743 Homo sapiens chromosome 21 open reading frame 88 (C21orf88), non-codin  
 0.0724 Homo sapiens mab-21-like 2 (C. elegans) (MAB21L2), mRNA.  
 0.0723 Homo sapiens scavenger receptor class A, member 5 (putative) (SCARA5), n  
 0.0719 Homo sapiens FXYD domain containing ion transport regulator 3 (FXYD3), m  
 0.0704 Homo sapiens lectin, galactoside-binding, soluble, 4 (LGALS4), mRNA.  
 0.0686 Homo sapiens bestrophin 4 (BEST4), mRNA.  
 0.0684 Homo sapiens hydroxysteroid (17-beta) dehydrogenase 2 (HSD17B2), mRNA  
 0.0683 Homo sapiens calcineurin-like EF-hand protein 2 (CHP2), mRNA.  
 0.0673 Homo sapiens carbohydrate (N-acetylglucosamine 6-O) sulfotransferase 5 (C  
 0.0663 Homo sapiens phospholipase A2, group IIA (platelets, synovial fluid) (PLA2G  
 0.0657 Homo sapiens deoxyribonuclease I-like 3 (DNASE1L3), mRNA.  
 0.065 Homo sapiens synemin, intermediate filament protein (SYNM), mRNA.  
 0.0638 Homo sapiens FXYD domain containing ion transport regulator 1 (FXYD1), m  
 0.0637 Homo sapiens heat shock 22kDa protein 8 (HSPB8), mRNA.  
 0.0635 Homo sapiens solute carrier family 51, beta subunit (SLC51B), mRNA.  
 0.0626 Homo sapiens creatine kinase, brain (CKB), mRNA.  
 0.0624 Homo sapiens ST6 (alpha-N-acetyl-neuraminyl-2,3-beta-galactosyl-1, 3)-N-ε  
 0.062 Homo sapiens solute carrier family 26, member 3 (SLC26A3), mRNA.  
 0.0611 Homo sapiens chromosome 2 open reading frame 40 (C2orf40), mRNA.  
 0.0609 Homo sapiens peptidase inhibitor 3, skin-derived (PI3), mRNA.  
 0.0608 Homo sapiens homeobox B13 (HOXB13), mRNA.  
 0.0607 Homo sapiens neurexophilin and PC-esterase domain family, member 1 (NXF  
 0.0576 Homo sapiens phosphoglucomutase 5 (PGM5), mRNA.  
 0.0572 Homo sapiens desmin (DES), mRNA.  
 0.0571 Homo sapiens mannosyl (alpha-1,3-)-glycoprotein beta-1,4-N-acetylglucosar

Table S1

0.0567 Homo sapiens heat shock protein, alpha-crystallin-related, B6 (HSPB6), mRNA  
 0.0565 Homo sapiens calponin 1, basic, smooth muscle (CNN1), mRNA.  
 0.0555 Homo sapiens carcinoembryonic antigen-related cell adhesion molecule 7 (CEACAM7), mRNA.  
 0.0554 Homo sapiens cDNA FLJ33867 fis, clone CTONG2006568.  
 0.055 Homo sapiens myosin, light chain 9, regulatory (MYL9), mRNA.  
 0.0548 Homo sapiens ADAM-like, decysin 1 (ADAMDEC1), mRNA.  
 0.0531 Homo sapiens V-set and immunoglobulin domain containing 2 (VSIG2), mRNA.  
 0.0515 Homo sapiens C-type lectin domain family 3, member B (CLEC3B), mRNA.  
 0.0504 Homo sapiens myosin, heavy chain 11, smooth muscle (MYH11), mRNA.  
 0.0502 Homo sapiens tetraspanin 1 (TSPAN1), mRNA.  
 0.05 Homo sapiens peptidyl arginine deiminase, type II (PADI2), mRNA.  
 0.0499 Homo sapiens tachykinin receptor 2 (TACR2), mRNA.  
 0.0491 Homo sapiens claudin 8 (CLDN8), mRNA.  
 0.0481 Homo sapiens bestrophin 2 (BEST2), mRNA.  
 0.0468 Homo sapiens lectin, galactoside-binding, soluble, 2 (LGALS2), mRNA.  
 0.0456 Homo sapiens interleukin 1 receptor, type II (IL1R2), non-coding RNA.  
 0.0448 Ig alpha 1- alpha 2m=immunoglobulin A1-A2 lambda hybrid GAU heavy chain  
 0.0447 Homo sapiens metallothionein 1X (MT1X), mRNA.  
 0.0433 Homo sapiens serine peptidase inhibitor, Kazal type 1 (SPINK1), mRNA.  
 0.0418 Homo sapiens LY6/PLAUR domain containing 8 (LYPD8), mRNA.  
 0.0415 Homo sapiens actin, gamma 2, smooth muscle, enteric (ACTG2), mRNA.  
 0.0409 Homo sapiens fatty acid binding protein 1, liver (FABP1), mRNA.  
 0.0405 Homo sapiens RAB15 effector protein (REP15), mRNA.  
 0.0392 Homo sapiens dermatopontin (DPT), mRNA.  
 0.034 Homo sapiens carbonic anhydrase VII (CA7), mRNA.  
 0.0328 Homo sapiens HEPACAM family member 2 (HEPACAM2), mRNA.  
 0.0293 Homo sapiens mucin 2, oligomeric mucus/gel-forming (MUC2), mRNA.  
 0.0274 Homo sapiens metallothionein 1H (MT1H), mRNA.  
 0.0273 Homo sapiens neurexophilin and PC-esterase domain family, member 4 (NXF1), mRNA.  
 0.0272 Homo sapiens metallothionein 1F (MT1F), mRNA.  
 0.0269 Homo sapiens guanylate cyclase activator 2B (uroguanylin) (GUCA2B), mRNA.  
 0.024 Homo sapiens alcohol dehydrogenase 1C (class I), gamma polypeptide (ADH1C), mRNA.  
 0.0234 Homo sapiens metallothionein 1M (MT1M), mRNA.  
 0.0227 Homo sapiens cDNA FLJ41315 fis, clone BRAMY2043069.  
 0.022 Homo sapiens immunoglobulin J polypeptide, linker protein for immunoglobulin J chain  
 0.0218 Homo sapiens membrane-spanning 4-domains, subfamily A, member 12 (MS4D4), mRNA.  
 0.0209 Homo sapiens carbonic anhydrase IV (CA4), mRNA.  
 0.0201 Homo sapiens chromogranin A (parathyroid secretory protein 1) (CHGA), mRNA.  
 0.0185 Homo sapiens ST6 (alpha-N-acetyl-neuraminyl-2,3-beta-galactosyl-1, 3)-N-ε-sialosyltransferase 6 (ST6GALNAC2), mRNA.  
 0.0174 Homo sapiens metallothionein 1E (MT1E), mRNA.  
 0.0168 Homo sapiens aquaporin 8 (AQP8), mRNA.  
 0.0164 Homo sapiens Fc fragment of IgG binding protein (FCGBP), mRNA.  
 0.0144 Homo sapiens UDP glucuronosyltransferase 2 family, polypeptide B17 (UGT2B17), mRNA.  
 0.0136 Homo sapiens carbonic anhydrase II (CA2), mRNA.  
 0.0132 Homo sapiens UDP-GlcNAc:betaGal beta-1,3-N-acetylglucosaminyltransferase 2 (UGT2B17), mRNA.  
 0.0127 Homo sapiens glucagon (GCG), mRNA.  
 0.0123 Homo sapiens guanylate cyclase activator 2A (guanylin) (GUCA2A), mRNA.  
 0.0106 Homo sapiens insulin-like 5 (INSL5), mRNA.  
 0.0095 Homo sapiens intelectin 1 (galactofuranose binding) (ITLN1), mRNA.  
 0.0086 Homo sapiens cDNA FLJ33052 fis, clone TRACH1000074, highly similar to Ig heavy chain constant region 1  
 0.0084 Homo sapiens peptide YY (PYY), mRNA.  
 0.0081 Homo sapiens metallothionein 1G (MT1G), mRNA.  
 0.0072 Homo sapiens somatostatin (SST), mRNA.

### Table S1

0.0022 Homo sapiens chloride channel accessory 1 (CLCA1), mRNA.  
0.002 Homo sapiens zymogen granule protein 16 (ZG16), mRNA.  
0.0017 Homo sapiens carbonic anhydrase I (CA1), mRNA.



## Table S1

nRNA.

n-specific cross reacting antigen) (CEACAM6), mRNA.  
(GPT2), mRNA.

GR5), mRNA.

serine esterase 1) (GZMB), mRNA.  
36), mRNA.  
rRNA.

..

l), mRNA.

.

to VASCULAR ENDOTHELIAL GROWTH FACTOR PRECURSOR.  
, member 6 (SLC6A6), non-coding RNA.

Table S1

3CB1), mRNA.

JA.

Jing RNA.

λ.

mRNA.

(CE2), mRNA.

RNA.

nRNA.

1), mRNA.

retained intron.

ES3), mRNA.

rRNA.

ptide translocator), member 4 (SLC25A4), nuclear gene encoding mitochondrial protein  
RNA.

mRNA.

111), mRNA.

5kDa (NDUFA1), nuclear gene encoding mitochondrial protein, mRNA.

Table S1

rRNA.

rRNA.

9), mRNA.

rRNA.

TH5), mRNA.

4), mRNA.

in, secreted, (semaphorin) 3B (SEMA3B), mRNA.

ing RNA.

5), mRNA.

3), mRNA.

7), mRNA.

), non-coding RNA.

amily M, alpha member 1 (KCNMA1), mRNA.

VA.

(HSPB7), mRNA.

VA.

8), mRNA.

nRNA.

y-terminal domain, 2 (CITED2), mRNA.

D10), mRNA.

P1R14D), mRNA.

clear gene encoding mitochondrial protein, mRNA.

ig activity polypeptide O (GNAO1), mRNA.

iRNA.

Table S1

08-11-02-F.

to Immunoglobulin lambda light chain.

VH43), mRNA.

..  
JA.

24), mRNA.

08-11-02-F.

3L), mRNA.  
GPT), mRNA.

RNA.

λ.  
coding mitochondrial protein, mRNA.  
, mRNA.

A.

Table S1

rRNA.  
se (PNCK), mRNA.  
X7A1), nuclear gene encoding mitochondrial protein, mRNA.

..

rRNA.  
6A2), mRNA.

F), mRNA.  
v.

mRNA.  
, mRNA.

g mitochondrial protein, mRNA.

RNA.

chondrial protein, mRNA.

mRNA.

rRNA.

amily M, beta member 1 (KCNMB1), mRNA.

v.

A.

## Table S1

mRNA.

er), member 2 (SLC28A2), mRNA.

nRNA.

nRNA.

nthase and cyclooxygenase) (PTGS1), mRNA.

B15), mRNA.

1IGD1), mRNA.

(AKR1B10), mRNA.

λ.

RNA.

A.

ρ1R14A), mRNA.

ι LAMBDA CHAIN C REGIONS.

ig RNA.

γRNA.

RNA.

λ.

:HST5), mRNA.

2A), mRNA.

RNA.

acetylgalactosaminide alpha-2,6-sialyltransferase 6 (ST6GALNAC6), mRNA.

ρE1), mRNA.

minyltransferase, isozyme B (MGAT4B), mRNA.

Table S1

IA.

EACAM7), mRNA.

IA.

in {membrane exon} [human, myeloma, mRNA Partial, 360 nt].

PE4), mRNA.

A.  
1C), mRNA.

ilin alpha and mu polypeptides (IGJ), mRNA.  
34A12), mRNA.

NA.  
acetylgalactosaminide alpha-2,6-sialyltransferase 1 (ST6GALNAC1), mRNA.

B17), mRNA.

e 7 (B3GNT7), mRNA.

delta chain.

Table S1



Table S1

Table S1

, mRNA.
