# Supplementary material for: Human colorectal cancer-specific CCAT1-L lncRNA regulates long-range chromatin interactions at the MYC locus
Source: PubMed Central journal article supplement — Cell Res. 2014 Mar 25;24(5):513–31. doi: 10.1038/cr.2014.35 (PMC4011346; doi:10.1038/cr.2014.35), 2014-03-25
Supplement: cr201435x9.pdf [file cr201435x9.pdf]

**Supplementary information, Table S2** List of primers used in this study.

(A) Primer sequence used in RT-PCR and qRT-PCR analysis.

ACTIN-qF: GCTCGTCGTCGACAACGGCTC

ACTIN-qR: CAAACATGATCTGGGTCATCTTCTC

CCAT1-L+S-q1F: ACGGTGACAGGTCATTAGGC

CCAT1-L+S-q1R: TTAAGTGCCTGAGCTCCACCT

CCAT1-L+S-q2F: ACTGCAGTAGGAAGGGAGCA

CCAT1-L+S-q2R: GTAAGCACTGGCCTTTCTGC

CCAT1-L-qF: CCACGTGCACATATTTGAATTG

CCAT1-L-qR: TGCATTCCCTGCTTAATACTCA

XIST-qF: GCAGGTCCAAGAAATTTGAACAC

XIST-qR: AGAGTGCCAGGCATGTTGATC

CTCF-qF: GTGTTCCATGTGCGATTACG

CTCF-qR: TCATGTGCCTTTTCAGCTTG

MYC-qF: TTGGCAGCAGGATAGTCCTT

MYC-qR: TGGTGCTCCATGAGGAGACA

FAM84B-qF: GTGCAAATGACCCTGGAGTT

FAM84B-qR: CCGTGGGAACTTCCTTGTA

sno-lnc5AC-qF: TTAGTCAGCTCAGGCCAGT

sno-lnc5AC-qR: AAGTGCTCCACCAACTCCAG

GAPDH-F: GGTATCGTGGAAGGACTCATGAC

GAPDH-R: ATGCCAGTGAGCTTCCCGTTCAG

ANKRD52-qF1: ACTGGATAACGGTGCAGACC

ANKRD52-qR1: ATGGTGCTCTCCACATCCTC

(B) Primer used in NRO.

Run-on-Myc-1F: TTCCAGAACAGCTGCTACCC  
Run-on-Myc-1R: CCTCCCTTCGCACTCAATAC  
Run-on-Myc-2F: TCCACCTCCAGCTTGTACCT  
Run-on-Myc-2R: GCTGTCGTTGAGAGGGTAGG  
Run-on-Myc-3F: GGCTGGATACCTTTCCCATT  
Run-on-Myc-3R: AAGCCCAAGGTTTCAGAGGT  
Run-on-Myc-4F: AAAGGCCCCCAAGGTAGTTA  
Run-on-Myc-4R: AGCTTTTGCTCCTCTGCTTG

(C) Primer sequences used in CTCF ChIP.

CTCF-CCAT1-1F: TCATAATGCGGAAAGGGAAG  
CTCF-CCAT1-1R: AGTCCTTCCTGCTGACTCCA  
CTCF-CCAT1-2F: TTTGGGCAGACACTGACTTG  
CTCF-CCAT1-2R: AAGCAGAAACAGGACCCAGA  
CTCF-SNP-3F: CAGCAGATGAAAGGCACTGA  
CTCF-SNP-3R: CTCCCTCCCCACATAAAAT  
CTCF-MYC-4F: GCATTTGCTTTTCGGTCAAT  
CTCF-MYC-4R: CTTGCTTCGGTTCATCAAT  
CTCF-MYC-5F: TGCAGCAAATCCAGCATAG  
CTCF-MYC-5R: TGCACTGCACAATTCAGCTT  
CTCF-MYC-6F: GGCACCTTGCCTGGAAGCTT  
CTCF-MYC-6R: GCAAGGAGAGCCTTTCAGAG  
CTCF-MYC-7F: GCCGATTTGATTCCTCTG  
CTCF-MYC-7R: GCTATCTCGGAGACGCACTT  
CTCF-Nctrl-8F:GACAAGCATTGTGCTGGAGA  
CTCF-Nctrl--8R:TCTAAAGACCATCGGCTGCT

CTCF-Nctrl--9F:AAGCCTGCCTGCTGAAAGTA  
CTCF-Nctrl--9R:CAGCTCACTCTGTGGGTTGA  
CTCF-Pctrl-chr6F: CAGCTCTGTGTCCTGTCTTATCC  
CTCF-Pctrl-chr6R: CAGCTATAATTGATGAAGAGGCG  
CTCF-Nctrl-F1: CCACTGCTCAGCCTTAGAGGAA  
CTCF-Nctrl-R1: GTTTGTCTGGTTTTTGC GTGTG  
CTCF-Nctrl-F2: TGCCATGCGTTGAAAATATCC  
CTCF-Nctrl-R2: TGCTTTCTGAAGTTGCCAAGC

(D) Primer sequences used for Northern blots.

MYC-probe-F: AGAGAAGCTGGCCTCCTACC  
MYC-probe-R-sp6:  
CCAAGCTATTTAGGTGACACTATAGAAAGCTTTTGCTCCTCTGCTTG  
CCAT1-probe-L+S: CCAGGGAGCCCTAAAACATT  
CCAT1-probe-L+S-R-T7:  
TGAATTGTAATACGACTCACTATAGGGAGGCTGGTCTGTGTGTGCTTTGG  
CCAT1-L-F(Chr8-3-F): ACATGCAGTTCAACCCCTTC  
CCAT1-L-R(Chr8-3-R): GCTGAAaATCTGCCTGCCTA  
EGFP-F: CACATGAAGCAGCACGACTT  
EGFP-R: AGTTCACCTTGATGCCGTTC

(E) Primer sequences used in biotin pull-down.

CCAT1-L-#1-F-HindIII: CCCAAGCTTCCAGGGAGCCCTAAAACATT  
CCAT1-L-#1-R-EcoRI: CCGGAATTCAGTGCAGTAGGAAGGGAGCA  
CCAT1-L-# 2-F-HindIII: CCCAAGCTTGTAAGCACTGGCCTTTCTGC  
CCAT1-L-# 2-R-XhoI: CCGCTCGAGGGGAGGAATGGGAGAGAGAG

CCAT1-L-# 3-F-HindIII: CCCAAGCTTGGCATGCTTGCTCAGTCTCT  
CCAT1-L-# 3-R-XhoI: CCGCTCGAGTGTTTGTGTATGCGTGTGTTTC  
CCAT1-L-# 4-F-HindIII: CCCAAGCTTTATACACCCTCCCTCCCACA  
CCAT1-L-# 4-R-EcoRI: CCGGAATTCAACAACCTCTGCTGATGGCTGT

(F) ASO sequences used to knockdown *CCAT1-L*.

CCAT1-ASO: mAmGmCmCmAGATCTGCAA mGmGmAmAmA

(G) Primers used in plasmids construction and validation of *in-cis* over-expression of *CCAT1-L* with modified TALEN A.

CCAT1-HF(HindIII): CCCAAGCTTTGGCCAGGTACATACCTGGC  
CCAT1-HR2(KpnI): GCCGGTACCTGCTTAACACGGCAGCTGGTA  
CCAT1-HL2(BamHI): GCGGATCCTTGCGAAAACGCTCACGATTC  
CCAT1-HR(XhoI): CGGCCTCGAGGTATATGTGTTAAAGTGTTAACAG  
CMV-F(KpnI): GCCGGTACCGCGTTGACATTGATTATTG  
CMV-R(bridge): GTGGGCTTGTA CTGCGTCATGGTGGCCGTACGCCC  
Puro-F(bridge): GGGCGTACGGCCACCATGACCGAGTACAAGCCCAC  
Puro-R(bridge): CTCTGCCCTCTCCACTGCCGGCACCGGGCTTGCGGGTC  
T2A-F(bridge): GACCCGCAAGCCCGGTGCCGGCAGTGGAGAGGGCAGAG  
BGH-R(BamHI): GCGGATCCTGTGATGCAATTTCTCAT  
CCAT1-ValidF: CTTCAGGCCATAGTCACTGGTG  
CCAT1-ValidR: GCAGGGCTGGCCAGGTCAGTGC  
CCAT1-ValidR2: AATAACTGTAAAGAGTAAGGGTCC  
BGH-F(EcoRI): CGGAATTCCGACTGTGCCTTCTAGTTG  
BGH-R(BglII): GGAAGATCTCCATAGAGCCCACCGCATC  
SV40-F(BglII): GGAAGATCTTGATCATAATCAGCCATAC

SV40-R(BamHI): CGGGATCCTAAGATACATTGATGAGTT

(H) Primer sequences used in 3C assay.

Bait 1: CTATTAATTGAGAGGTTATTGTGTGTTAGG

Bait2: ATGAAAGCATATCTATCTAGAGTGTTGAAG

Bait3: GAATTTGTATTATATGAACTGAGAATGAGG

1: CTAGGGTTCATATTTAGCTTAATTCTAT

2: TCTAGATTTCCCTTTAAAGTCCTTGTTTTAG

3: AGTCATCTATAATGTCTCTCACACATCTTT

4: GTATGTATGTATACAGGAATGAACAAACAA

5: TAAAAACAGAACAAAGTTGAAGGACTAATA

6: CTCTCTATATACGATTAAAACTGGGTTAGG

7: TTTTCTTTTTACCTATGACAAAACACTTTA

8: GTTAGAAGAATAATTAGAAGTTGGATGGAA

9: AGCTATACTTATTGAAACAAACCCTTTAGT

10: GTAAAAGGTAGCCTTTCTTCTCTCATAGT

11: CTATGTCCTATAATTCTAGCCAACAAAGTA

12: GTTAGAAGAATAATTAGAAGTTGGATGGAA

13: TTTTCTTTTTACCTATGACAAAACACTTTA

14: CTATTAATTGAGAGGTTATTGTGTGTTAGG

15: CTAGGGTTCATATTTAGCTTAATTCTAT

16: AACAGTATATGATATGATTTGGATGTTTGT

17: GAAGTAGAACAAGTTGGTAGAATATGAGAA

18: GTATGTATGTATACAGGAATGAACAAACAA

19: GTATTAAATAGGAACAATGCCTAATTCTG

21: AAATCTACCCAGAAAGTCTAATTAATCC

22: AGCTATACTTATTGAAACAAACCCTTTAGT  
23: GTTAGAAGAATAATTAGAAGTTGGATGGAA  
24: TTTTCTTTTTACCTATGACAAAACACTTTA  
25: CTACTTTCCCAGTTTAGACTACTAGTTTCC  
26: CTATTAATTGAGAGGTTATTGTGTGTTAGG  
27: CTTTAGATAAAATTCTTTCTTATTGGGTGT  
28: GAAGTAGAACAAGTTGGTAGAATATGAGAA  
29: GTATGTATGTATACAGGAATGAACAAACAA  
30: TAAAAACAGAACAAAGTTGAAGGACTAATA  
beta-globin-1: ATTCTGTGAATGTAGGTATGTGTTAAAAGT  
beta-globin-2: AGAGGTTCTTGTTGTCTTTTGTTTGTCT

(I) Primer sequences used in 3C-Seq assay.

p5-Scr-3C-seq-CCAT1-F:

AATGATACGGCGACCACCGAACACTCTTTCCCTACACGACGCTCTTCCGATCTGCCAA  
TCTTCTACTGATTGGCCCTAAAC

p5-ASO-3C-seq-CCAT1-F:

AATGATACGGCGACCACCGAACACTCTTTCCCTACACGACGCTCTTCCGATCTATGTC  
ACTTCTACTGATTGGCCCTAAAC

p7-3C-seq-CCAT1-R:

CAAGCAGAAGACGGCATAACGACAGTAGTGGGTCTTAATGCTTG
